# Supplementary material
Source: PubMed Central journal article supplement (PMC5915347)

# Dysphagia dose-response models

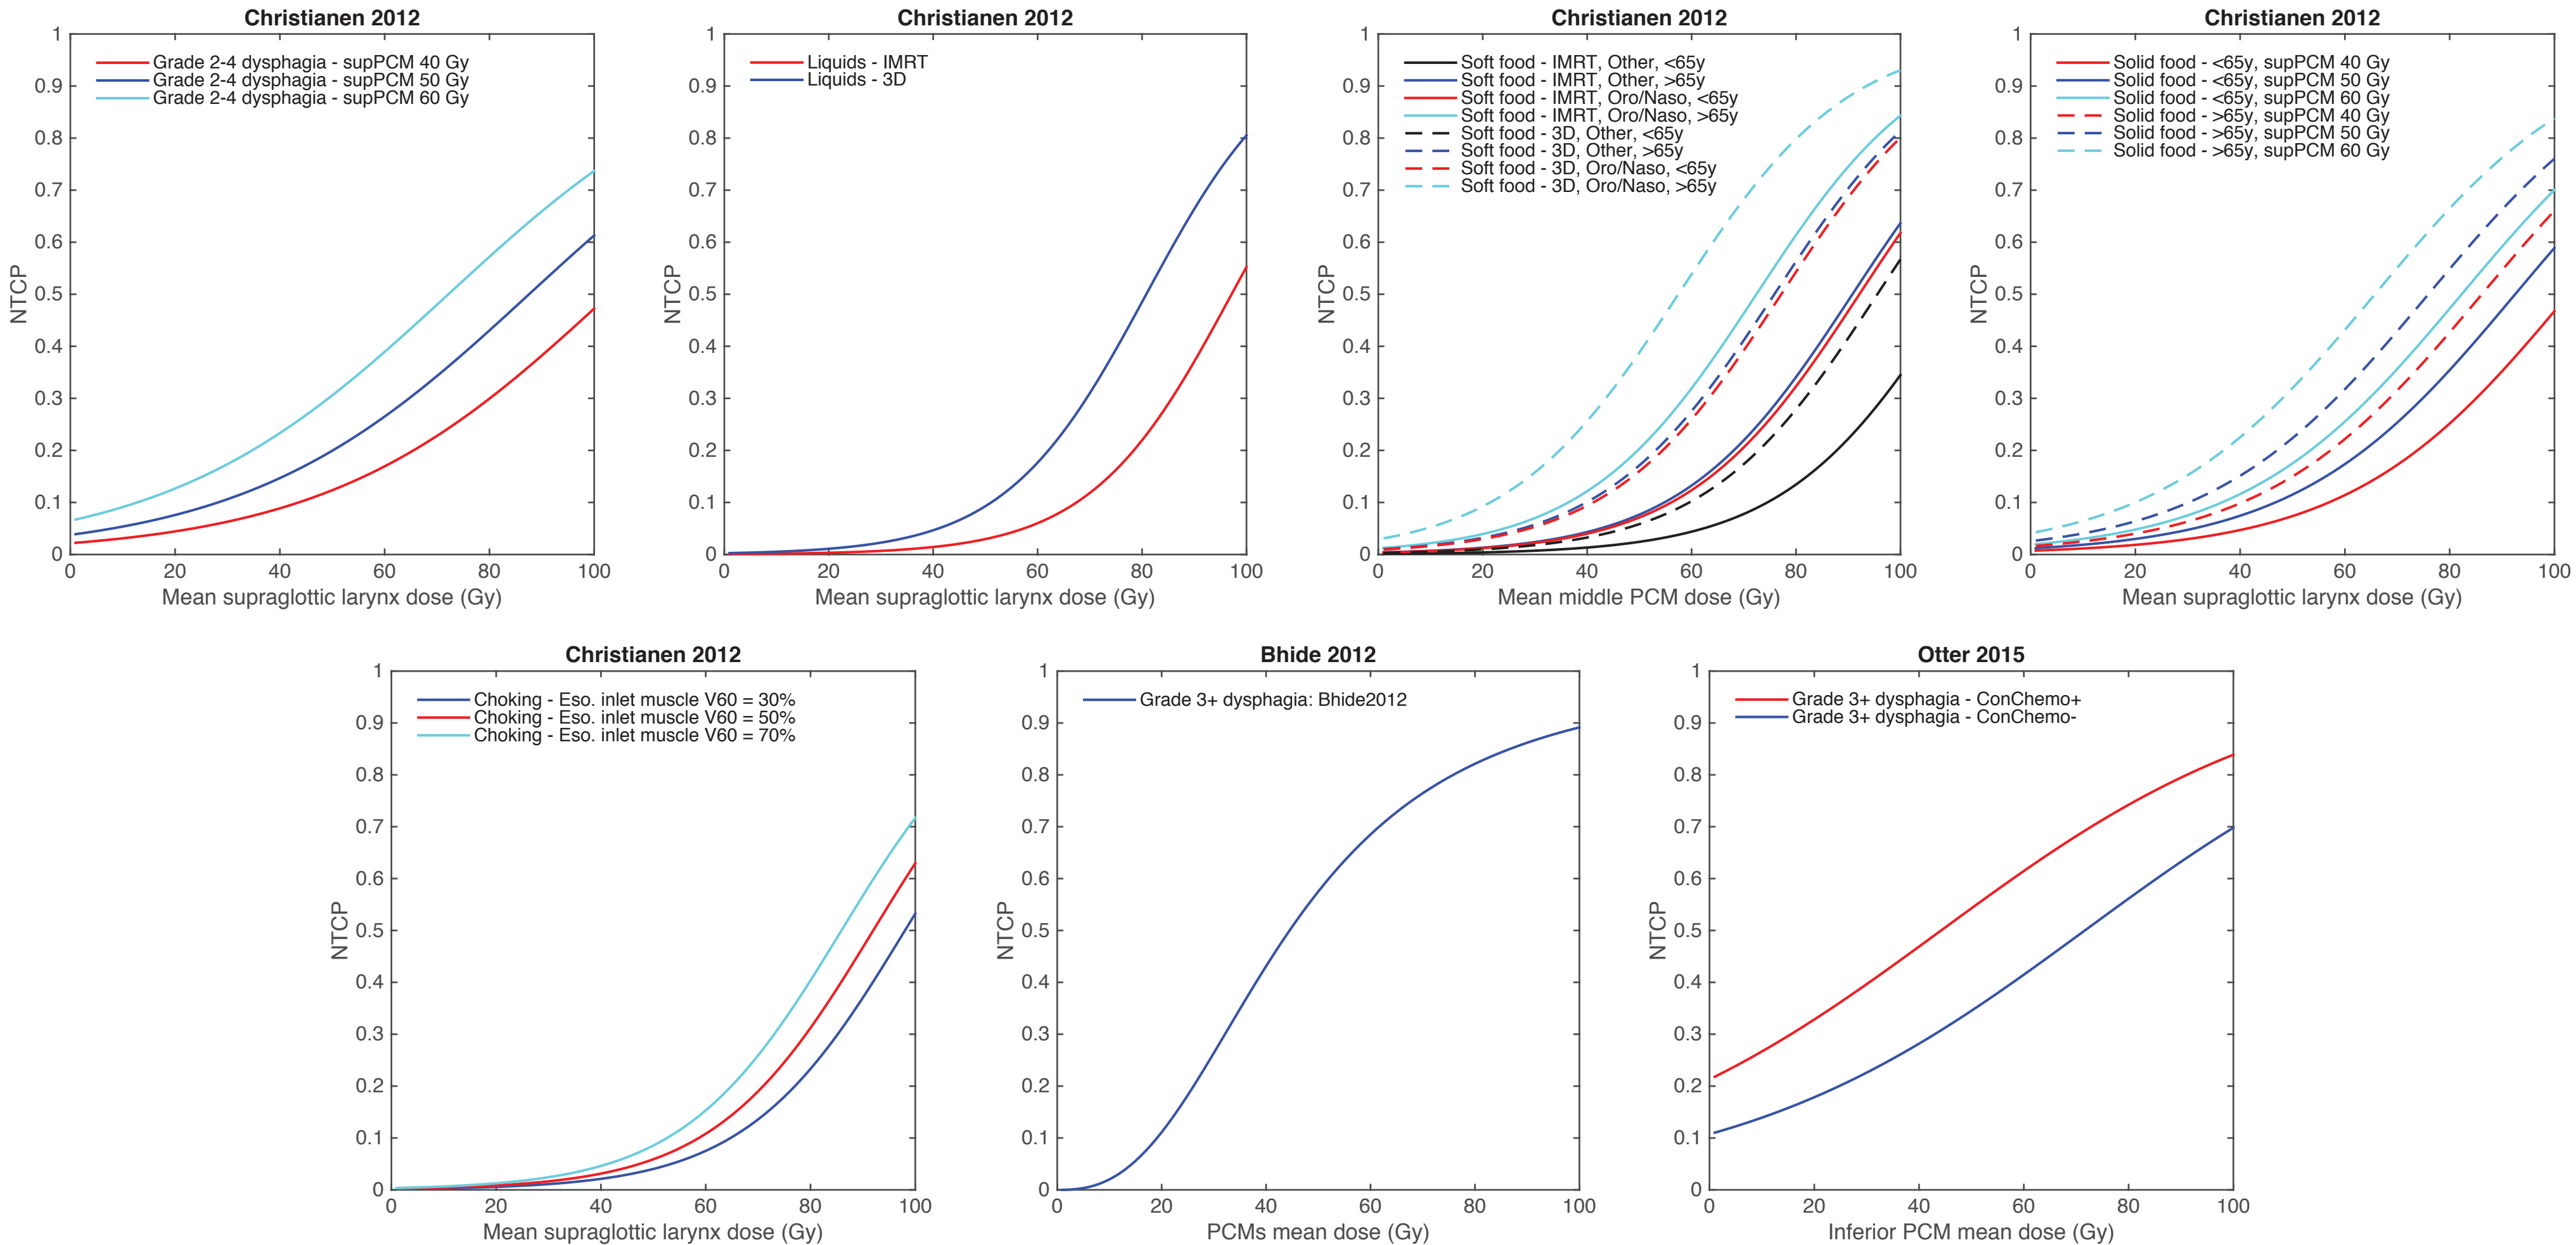

# Esophagitis dose-response models

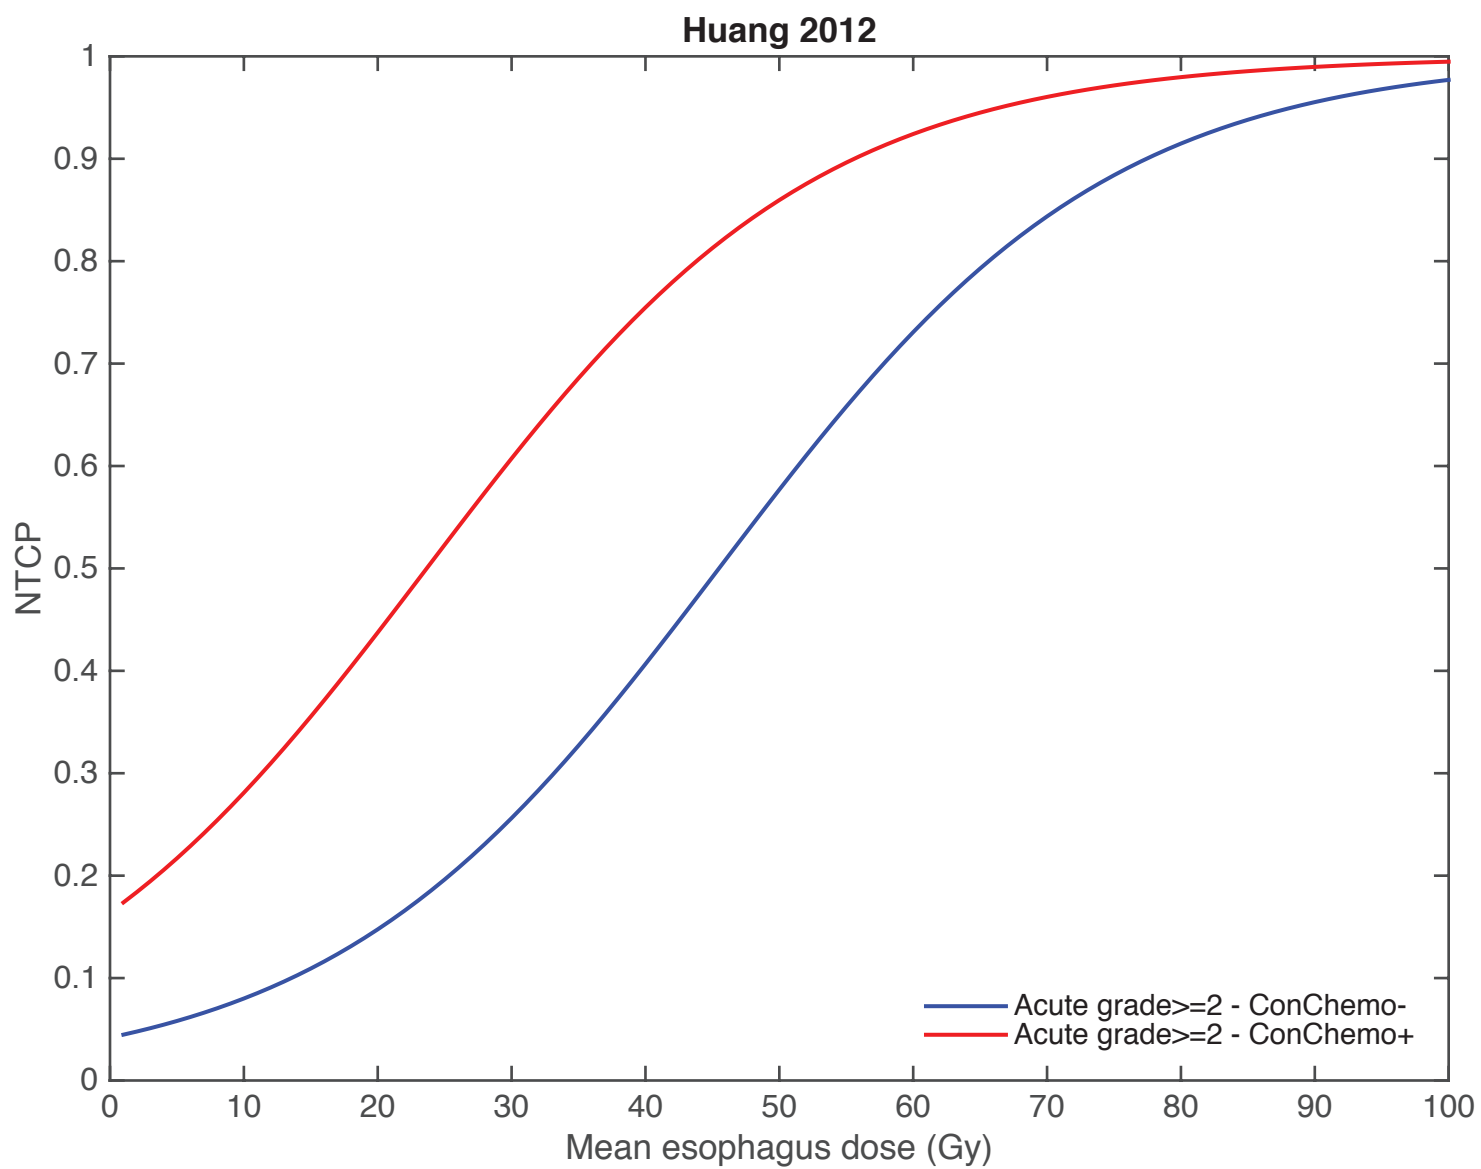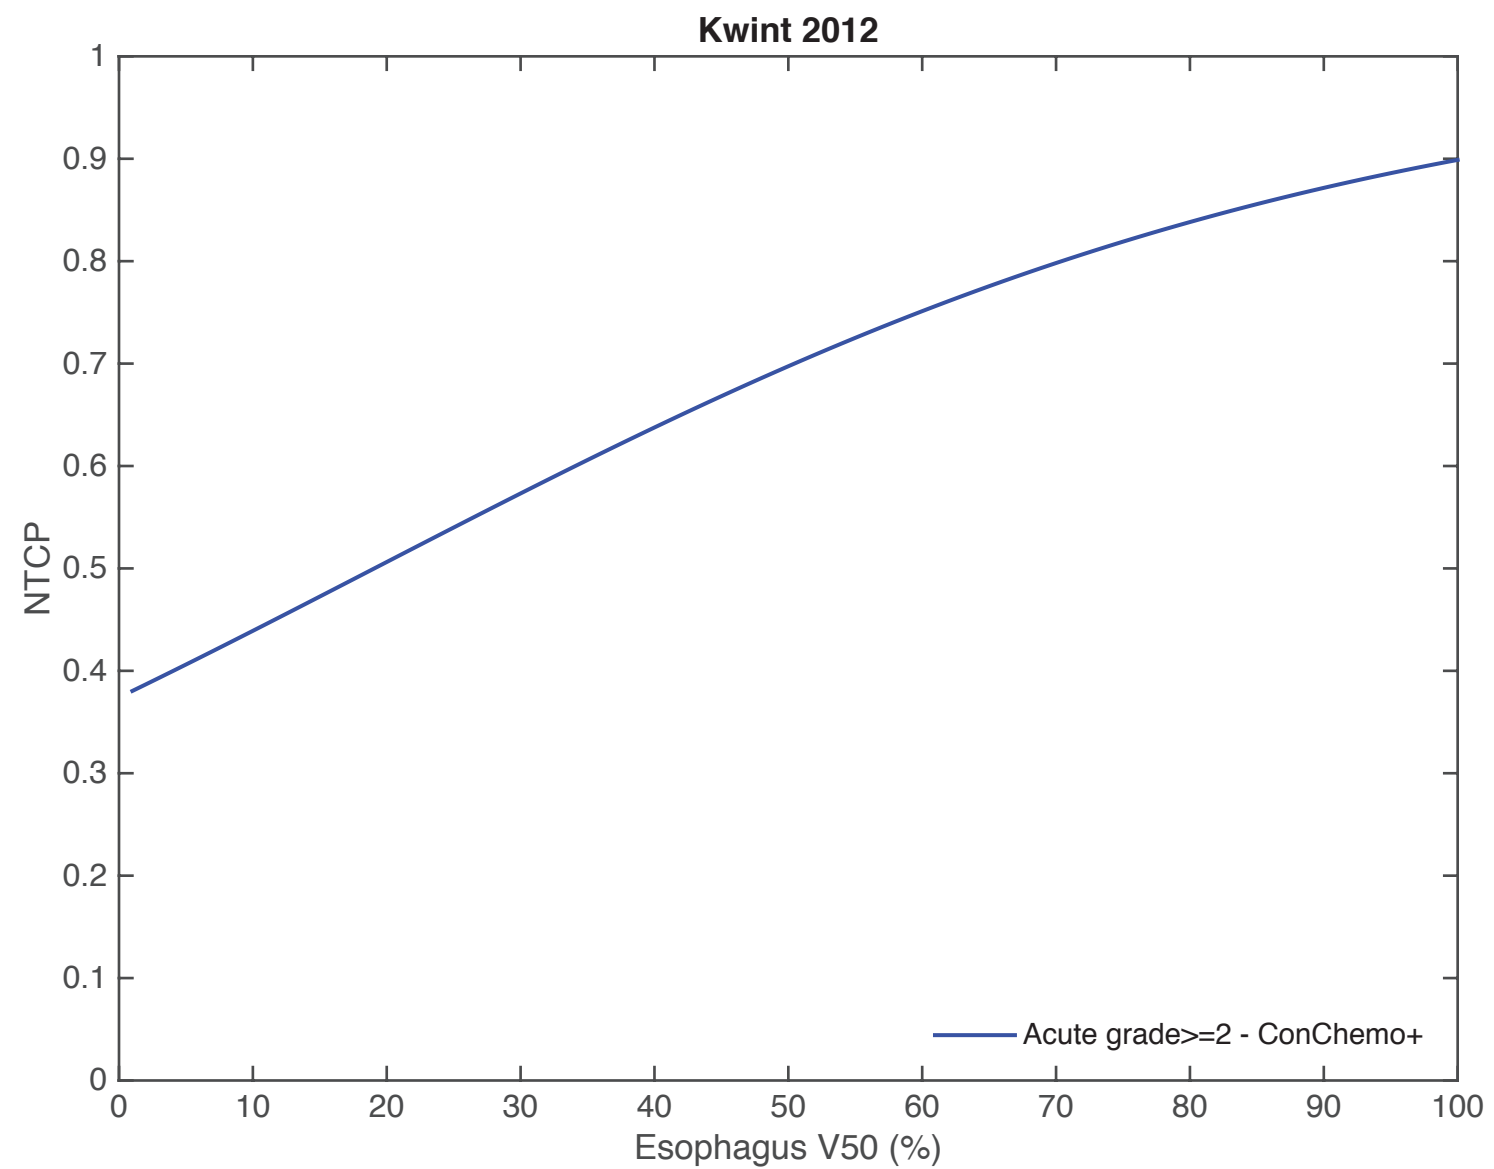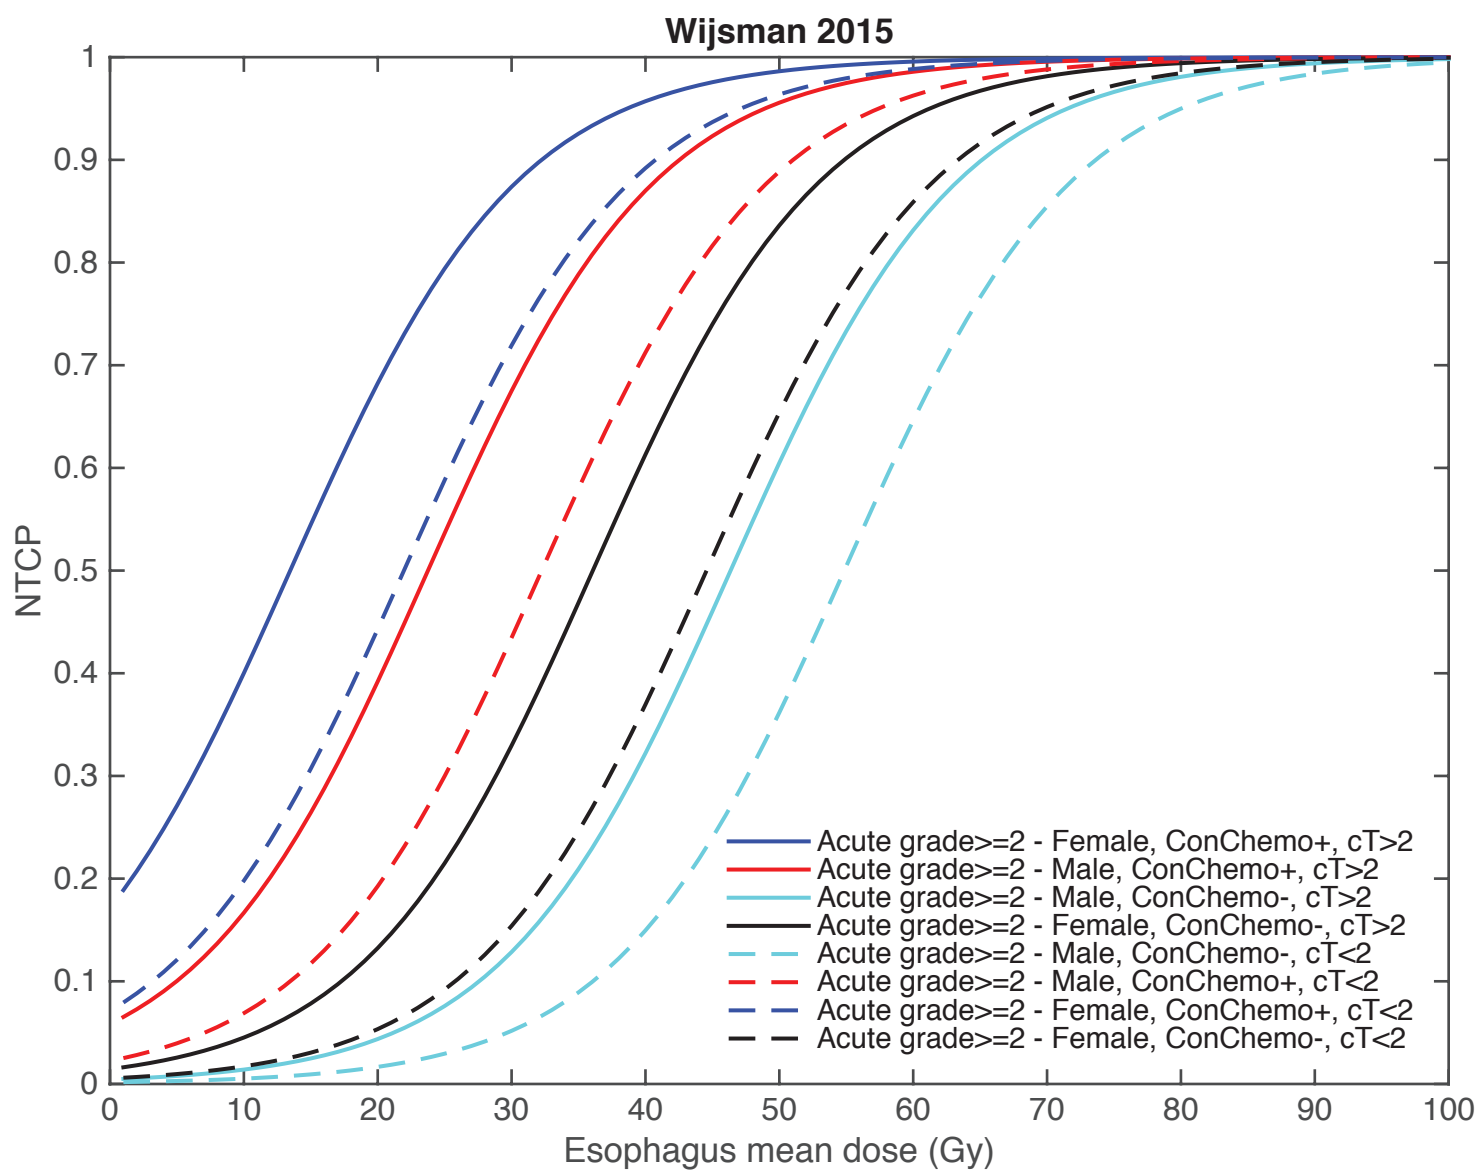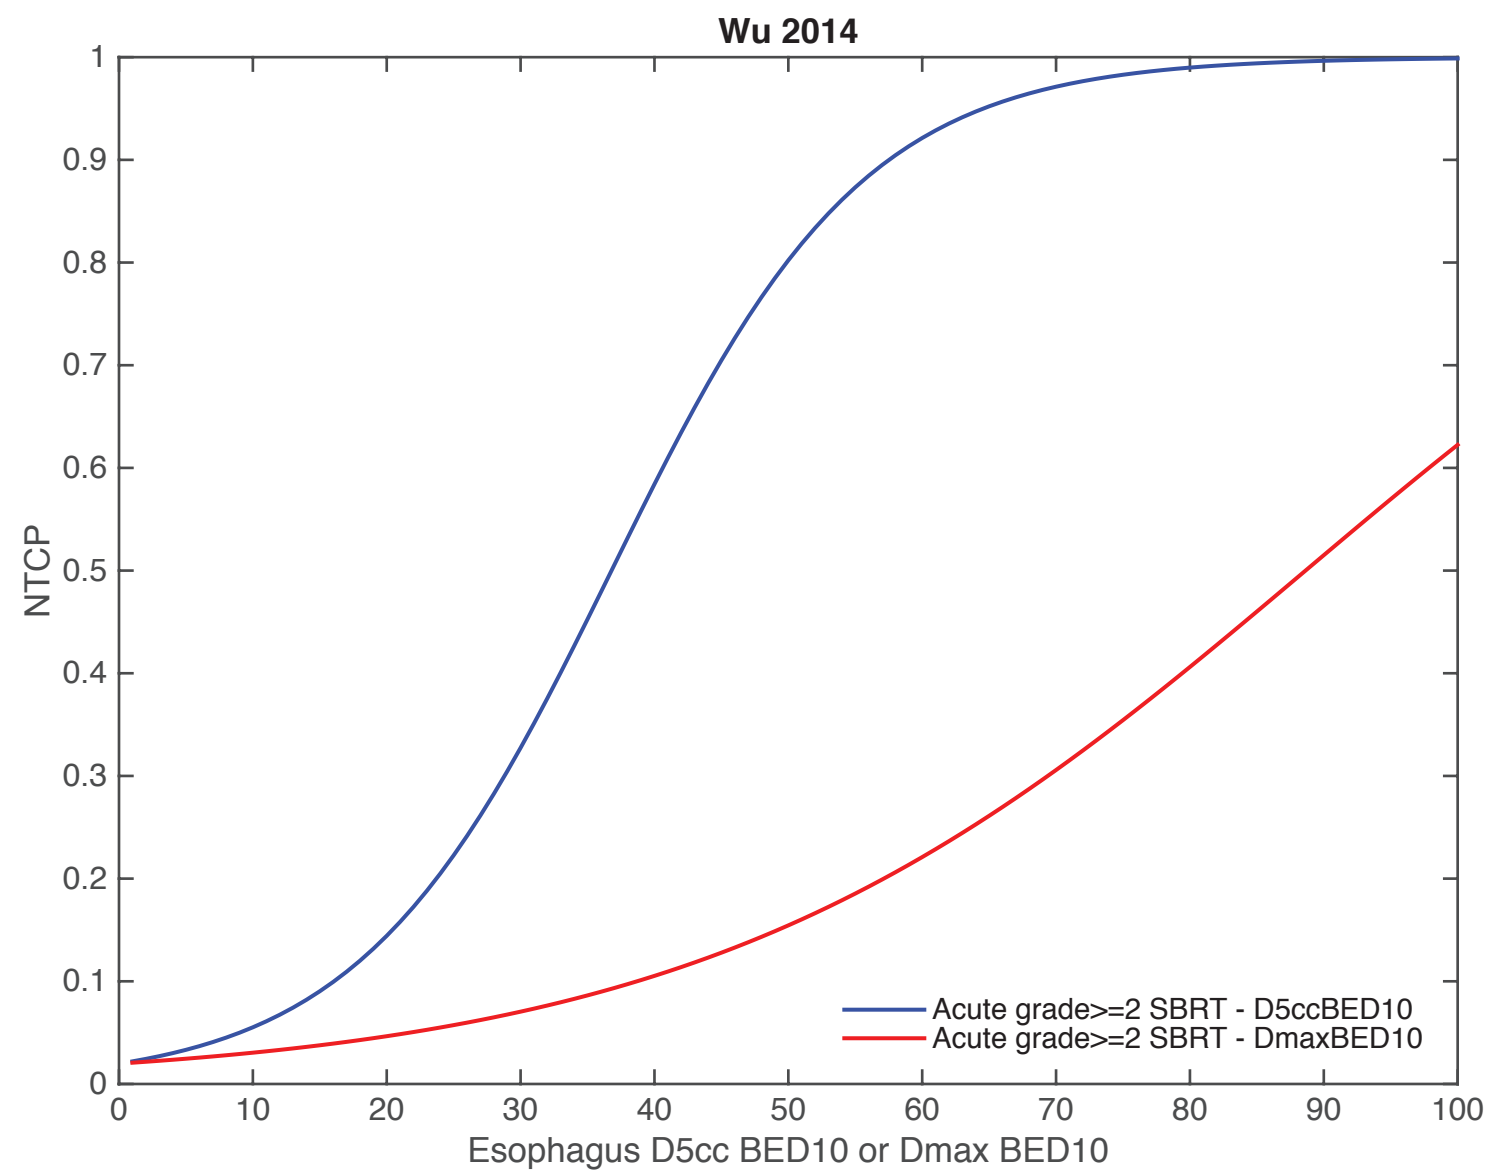

# Hypothyroidism dose-response models

## Bakhshandeh 2012

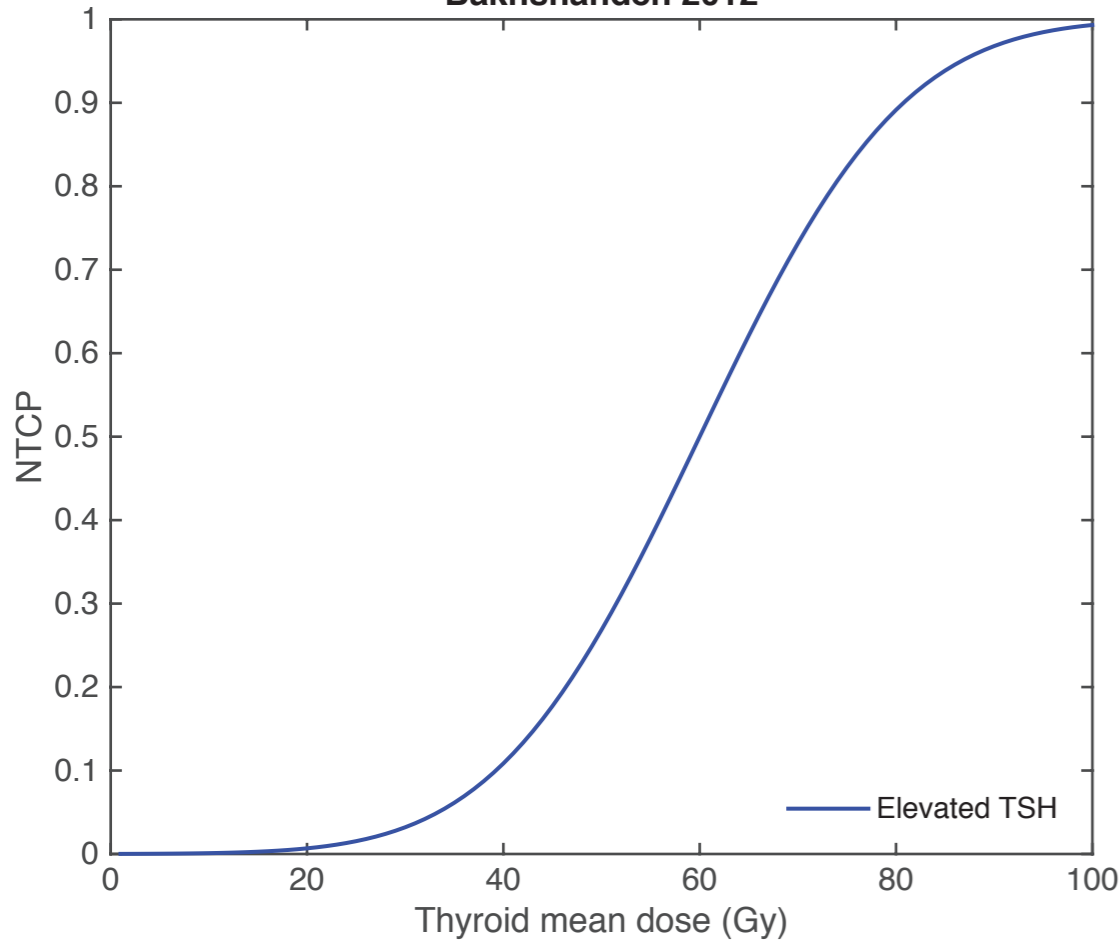

## Boomsma 2012

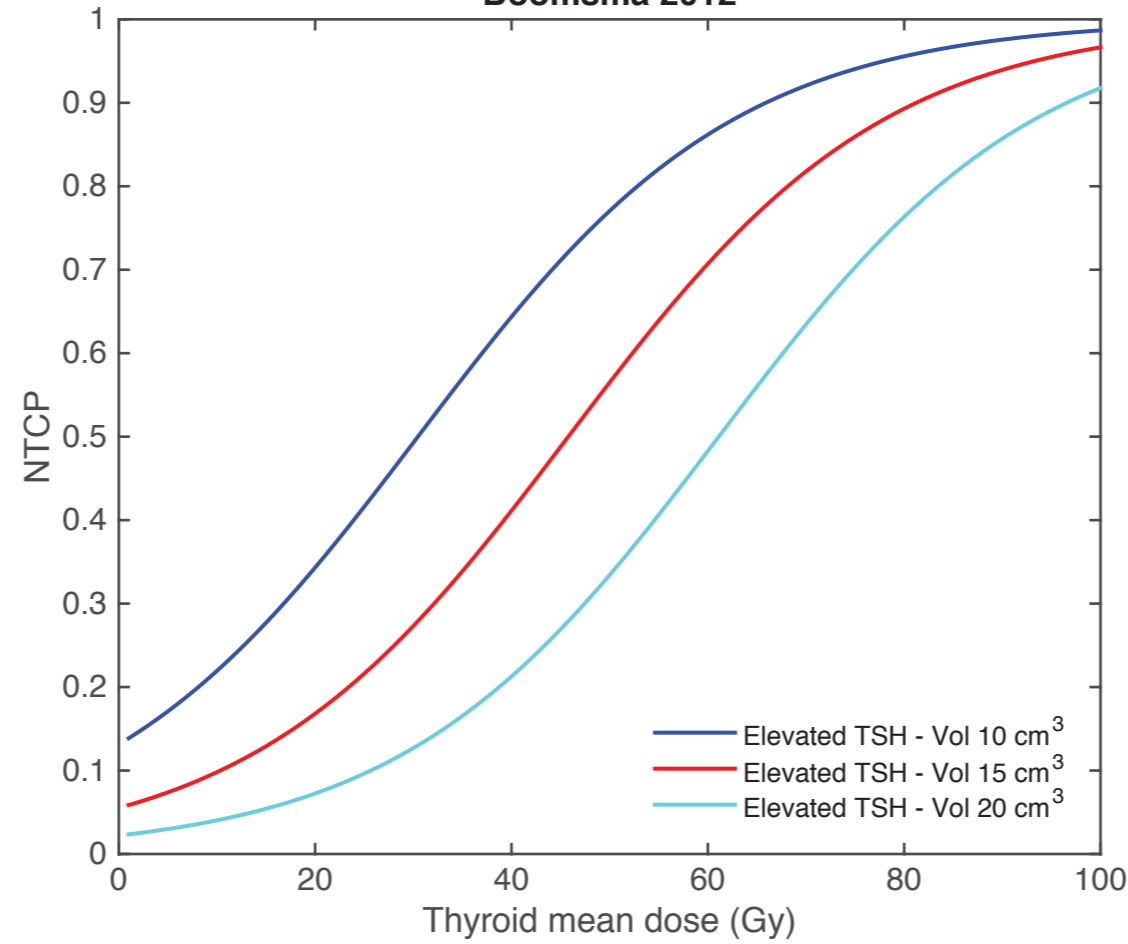

## Cella 2012

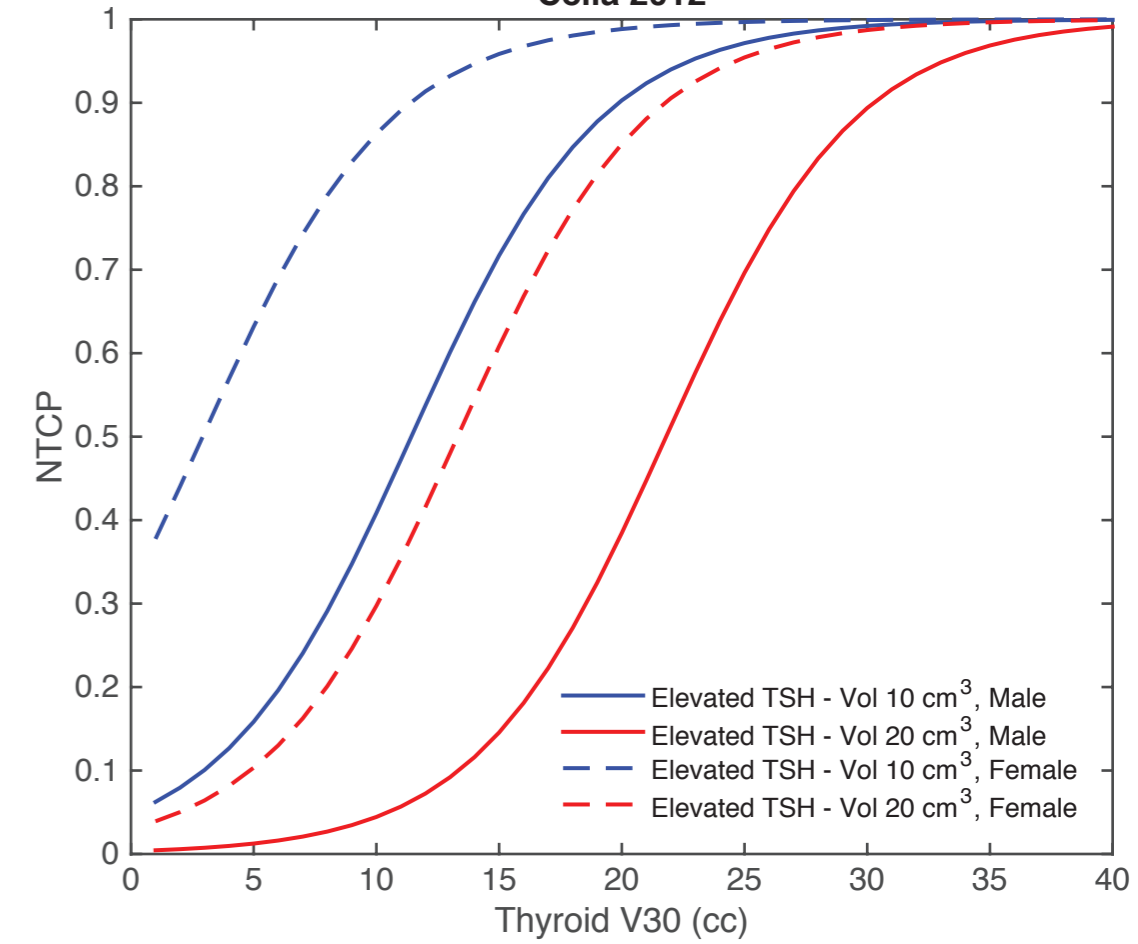

## Ronjom 2015

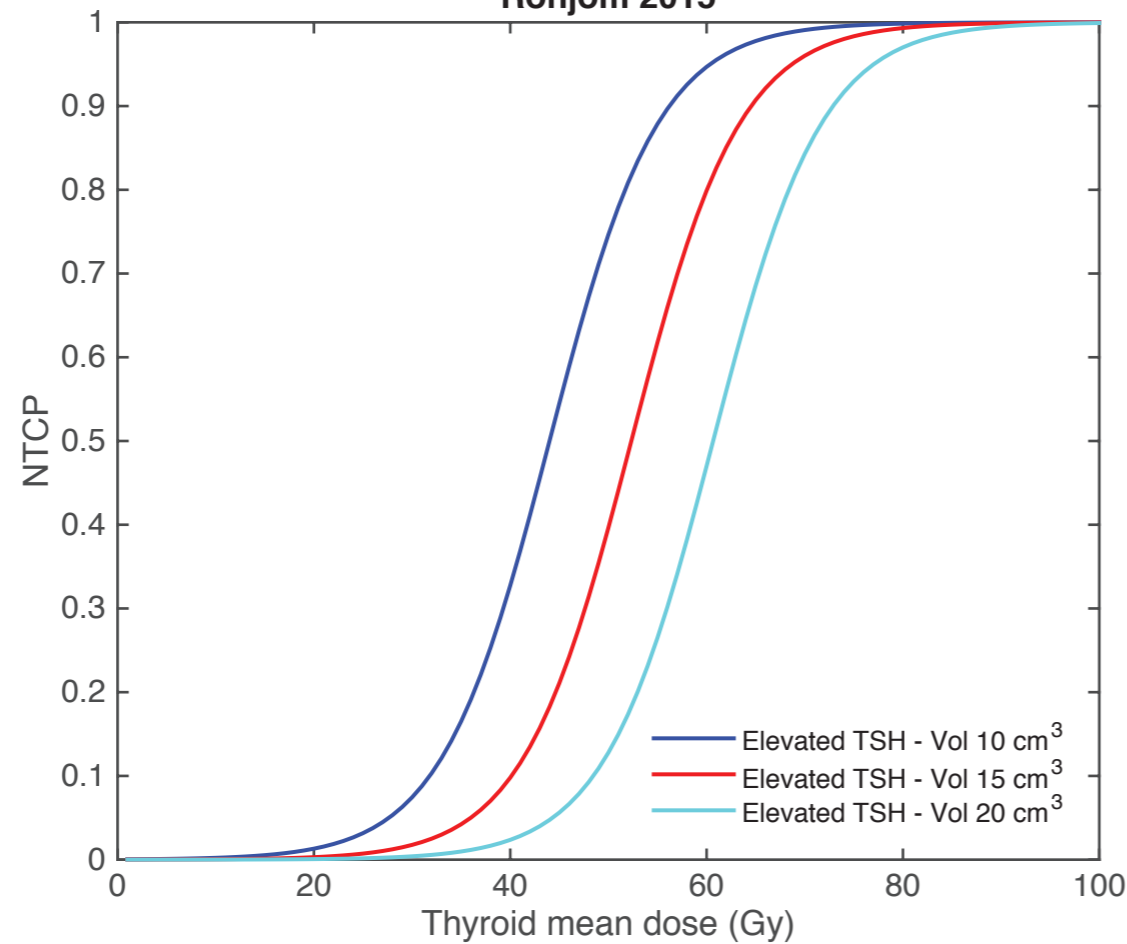

## Vogelius 2011

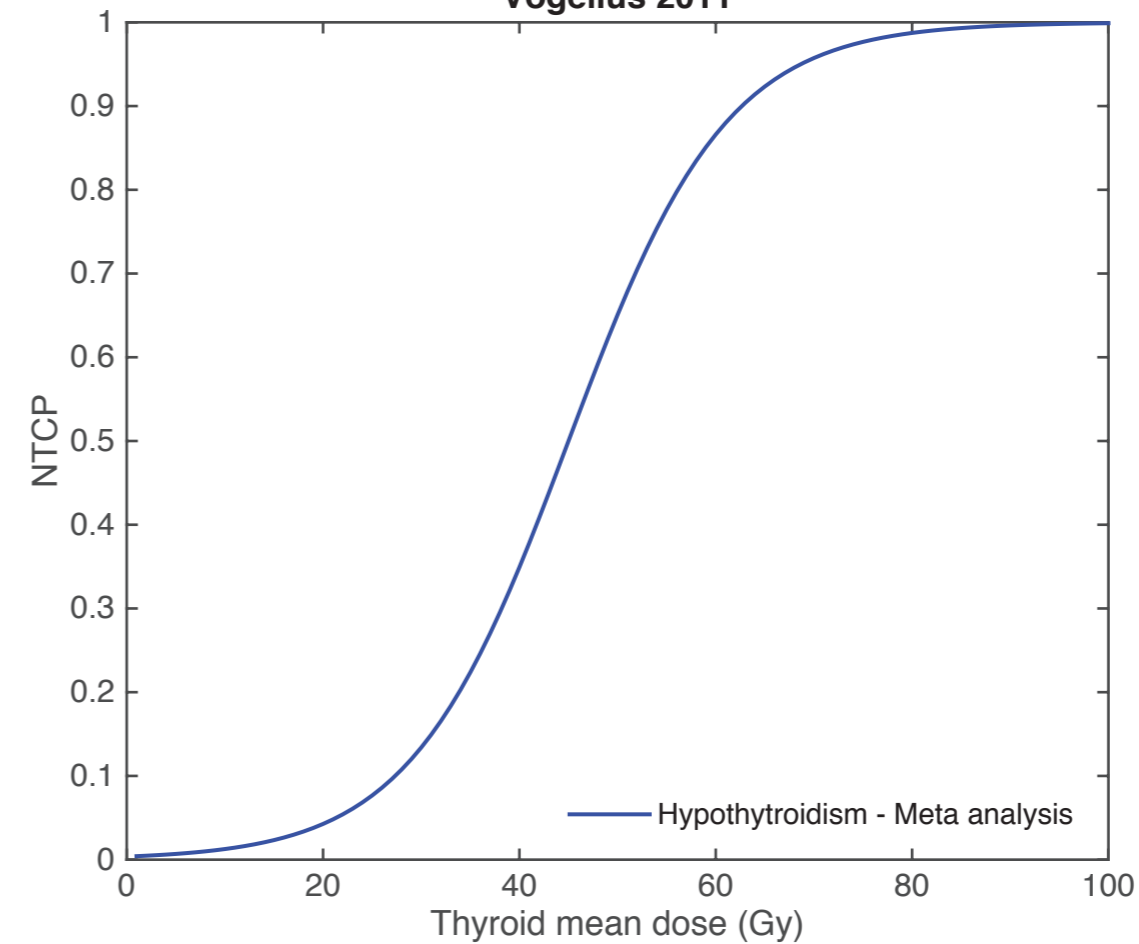

# Xerostomia dose-response models

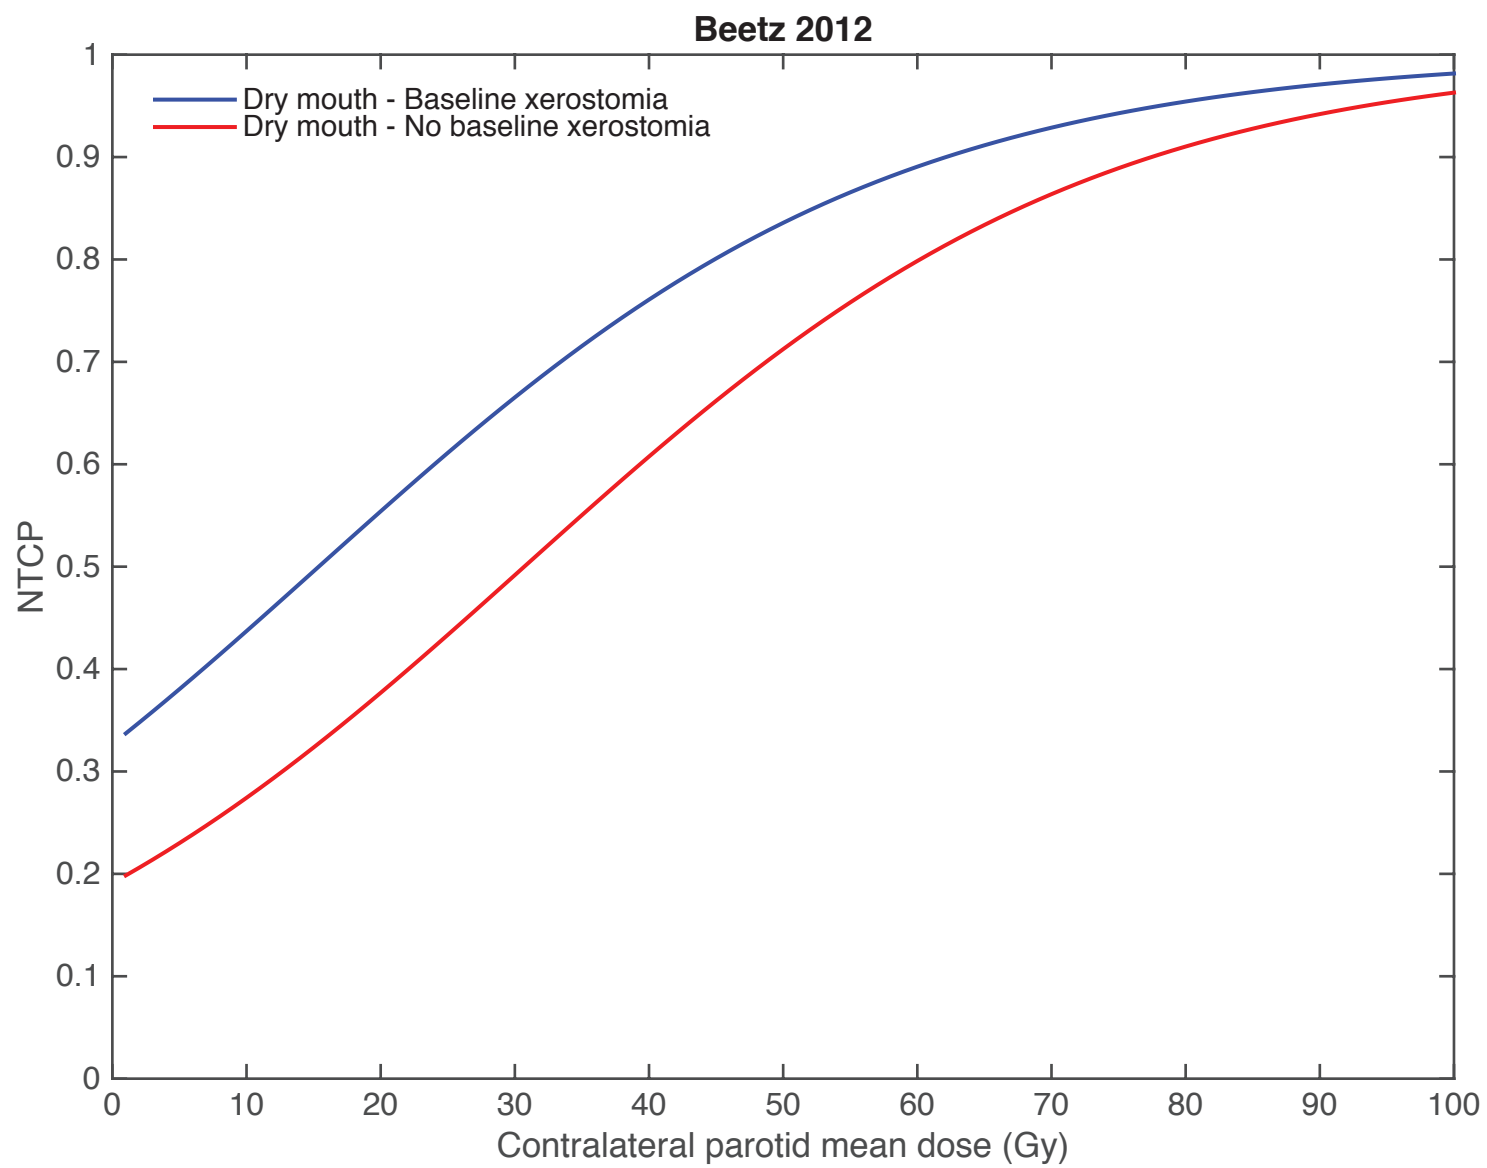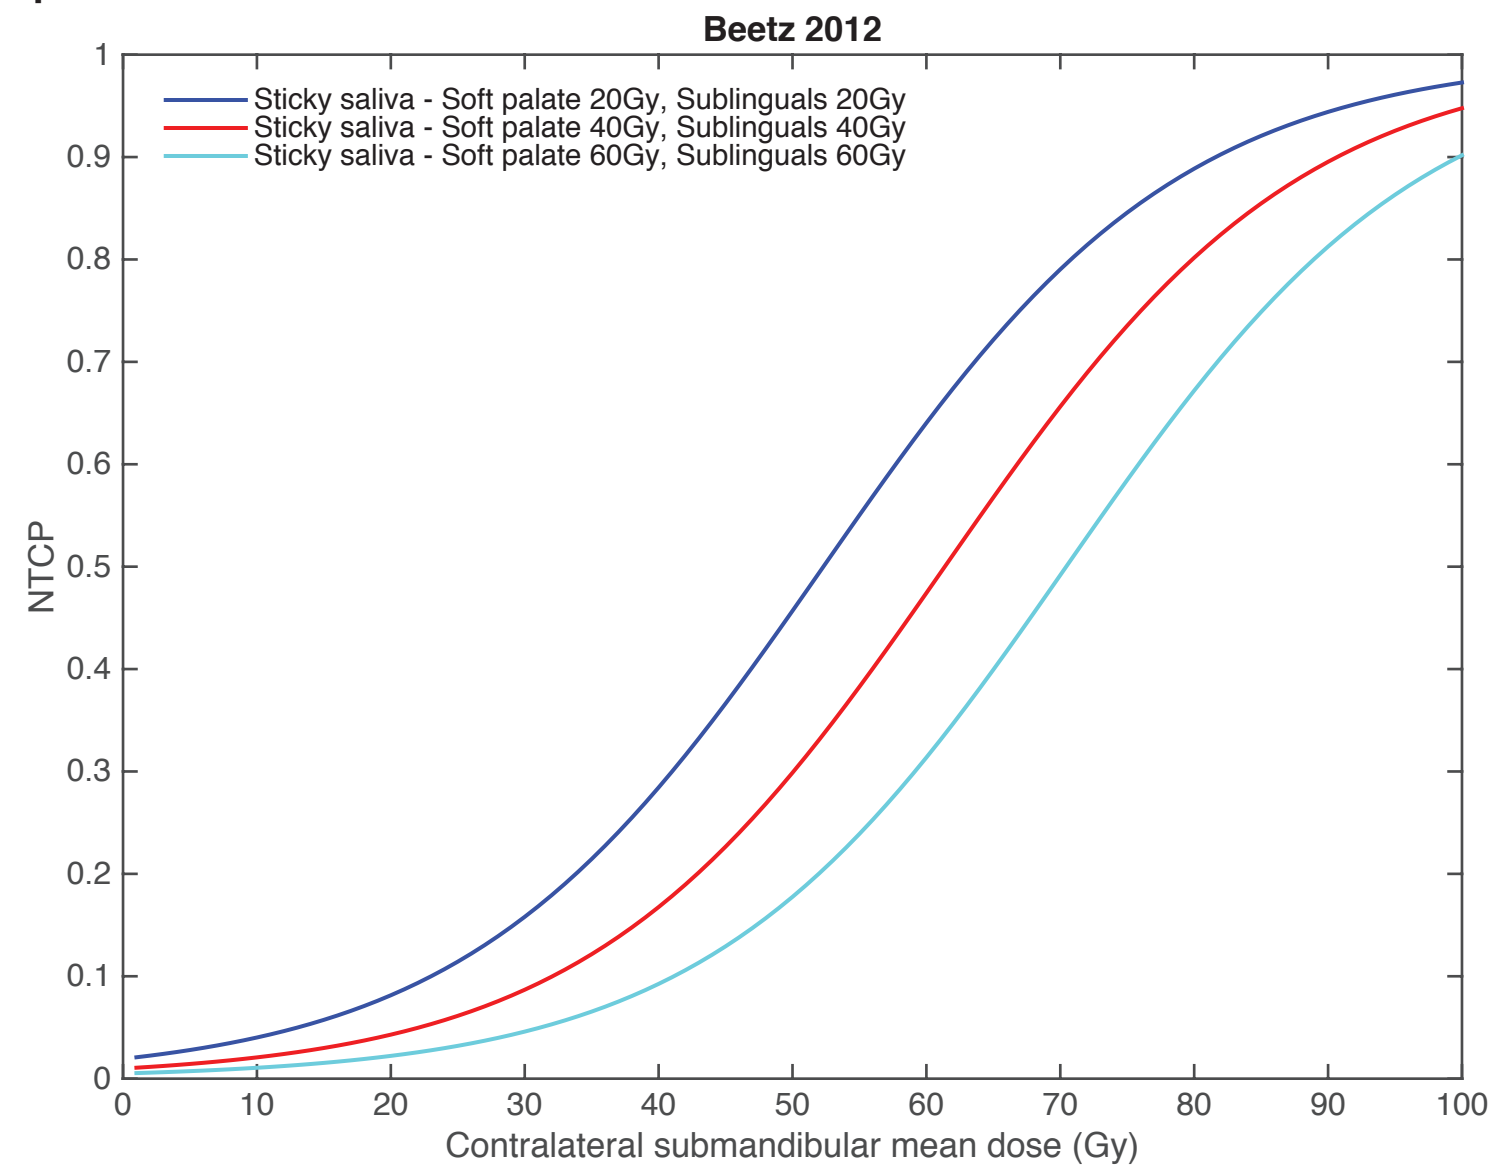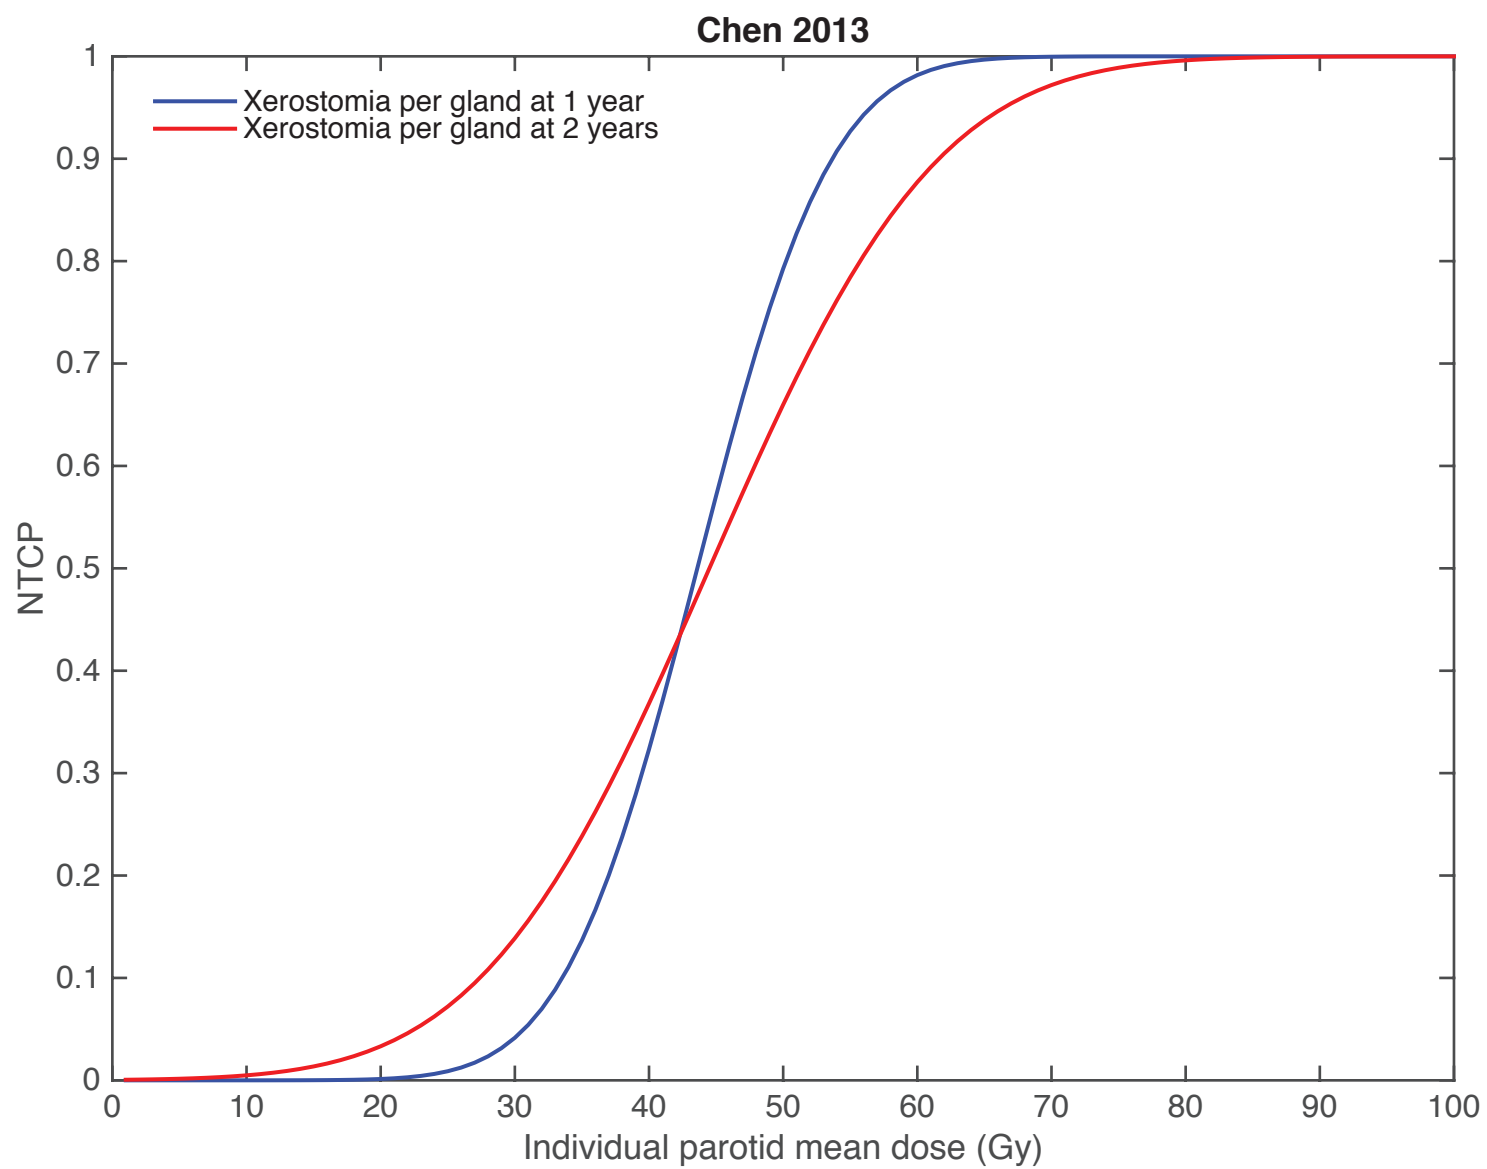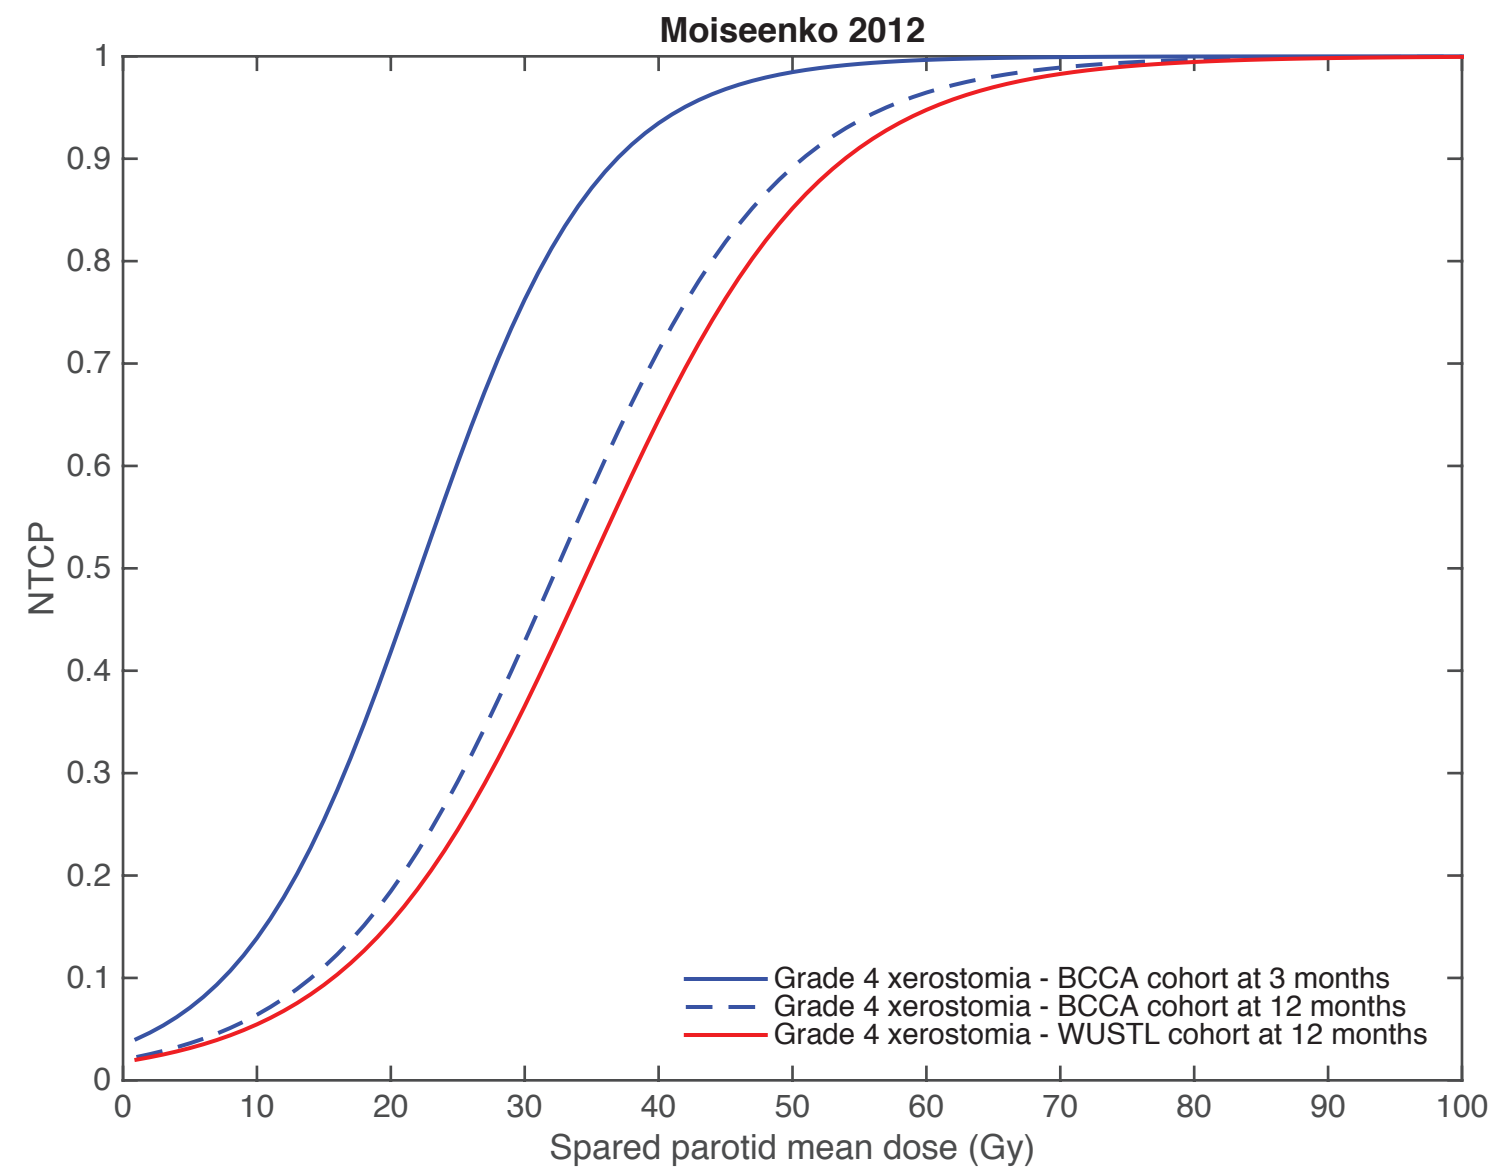

# Oral mucositis dose-response models

## Dean 2016

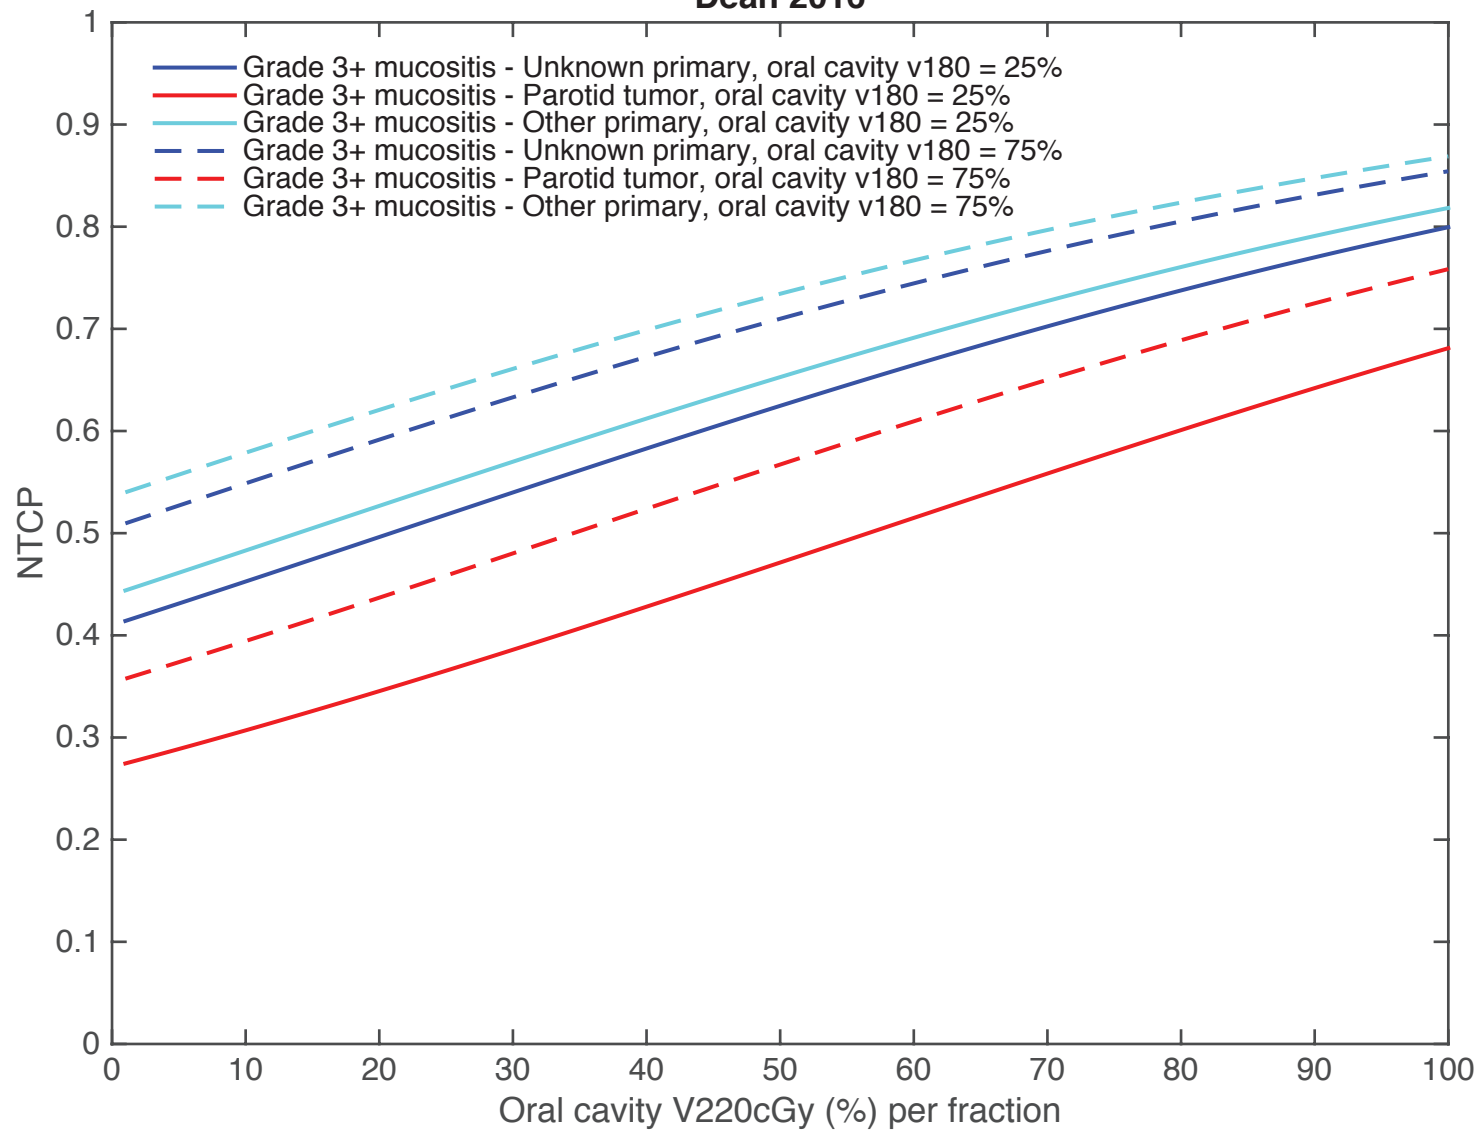

## Otter 2015

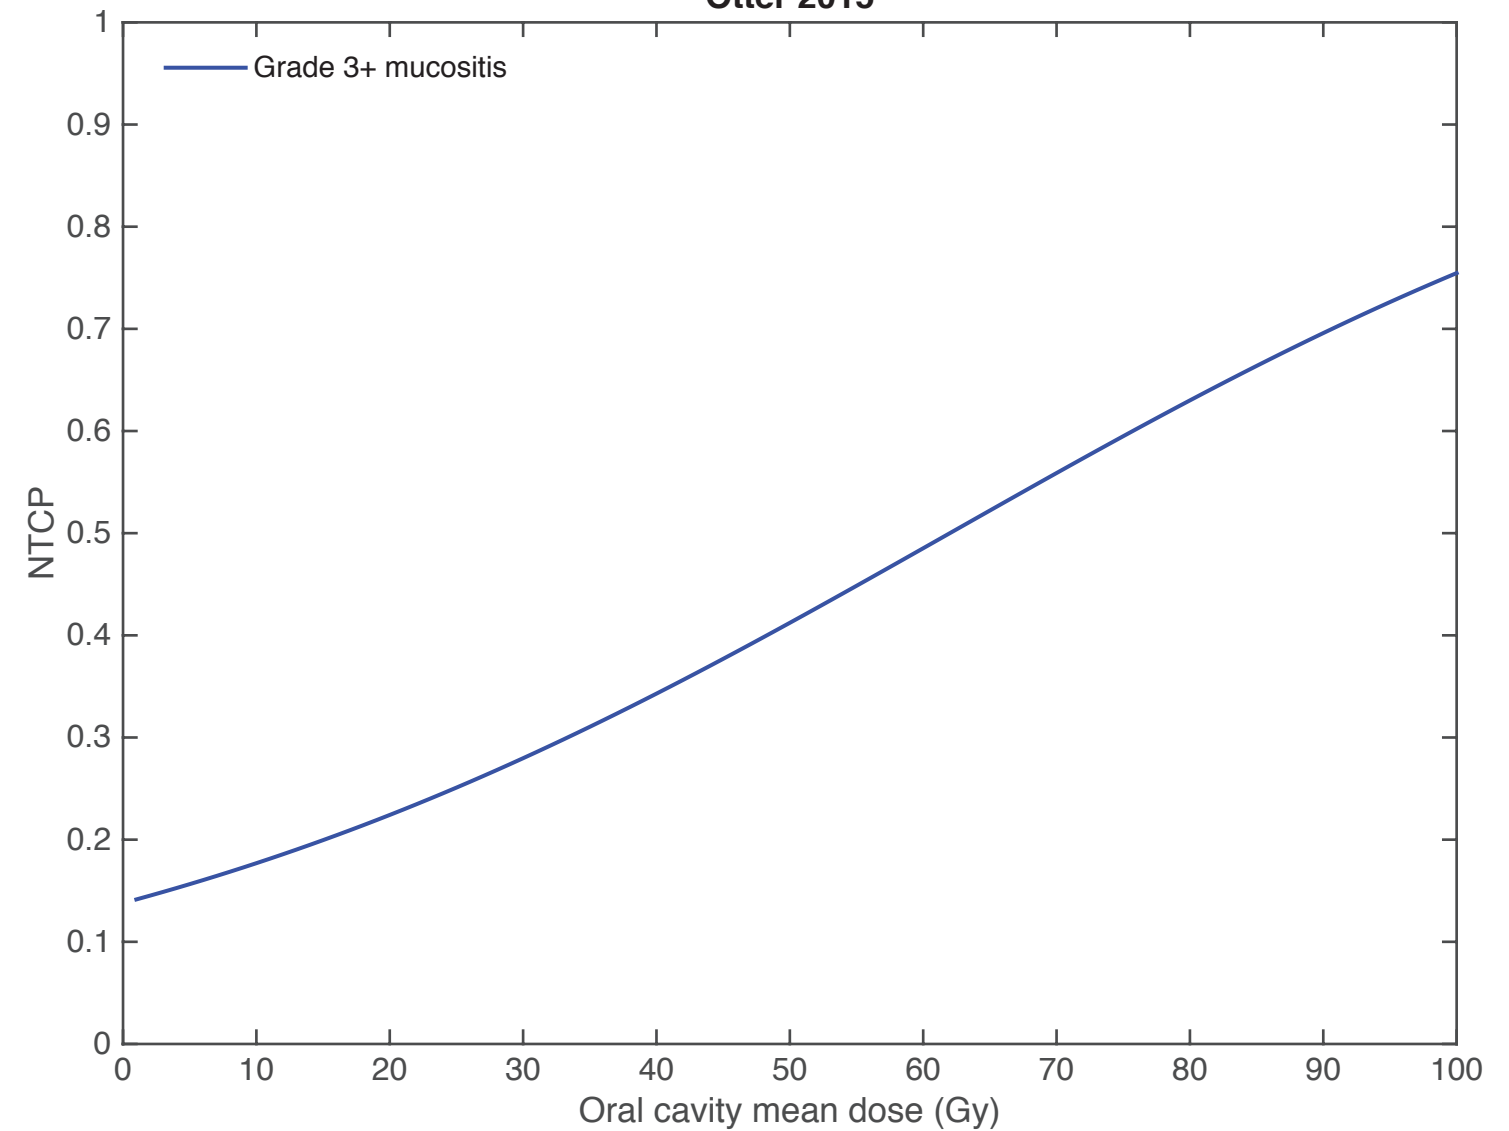

## Sanguineti 2011

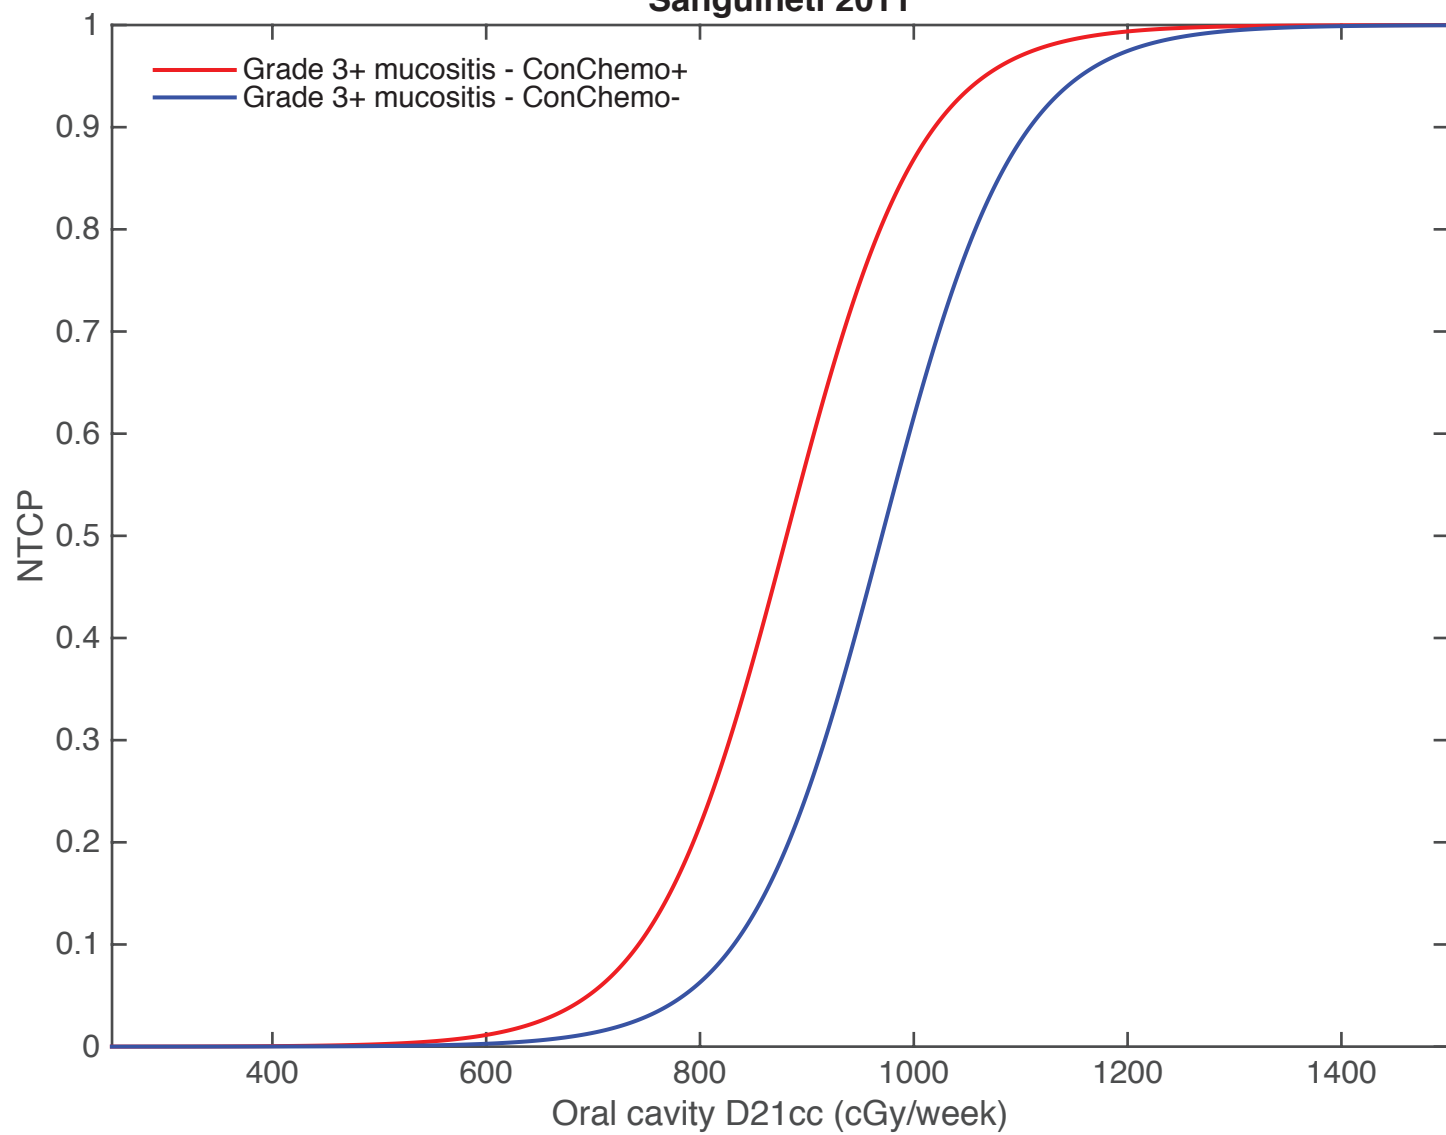

## Bhide 2012

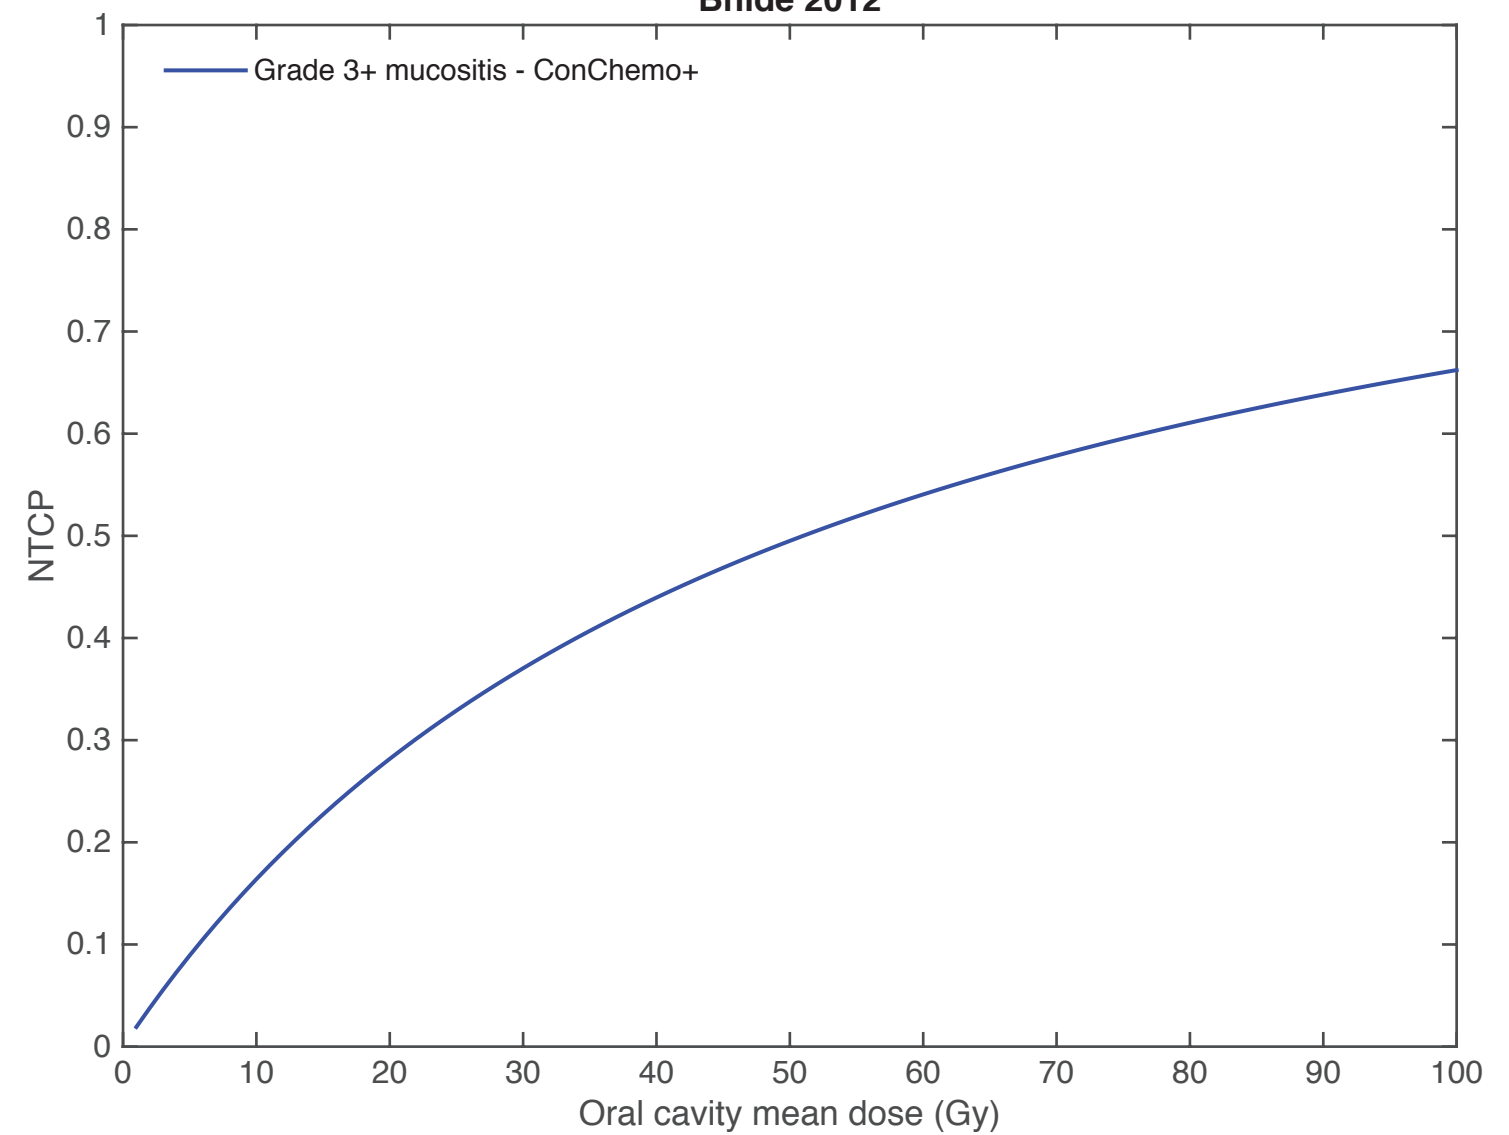

# Hearing loss dose-response models

De Marzi 2015

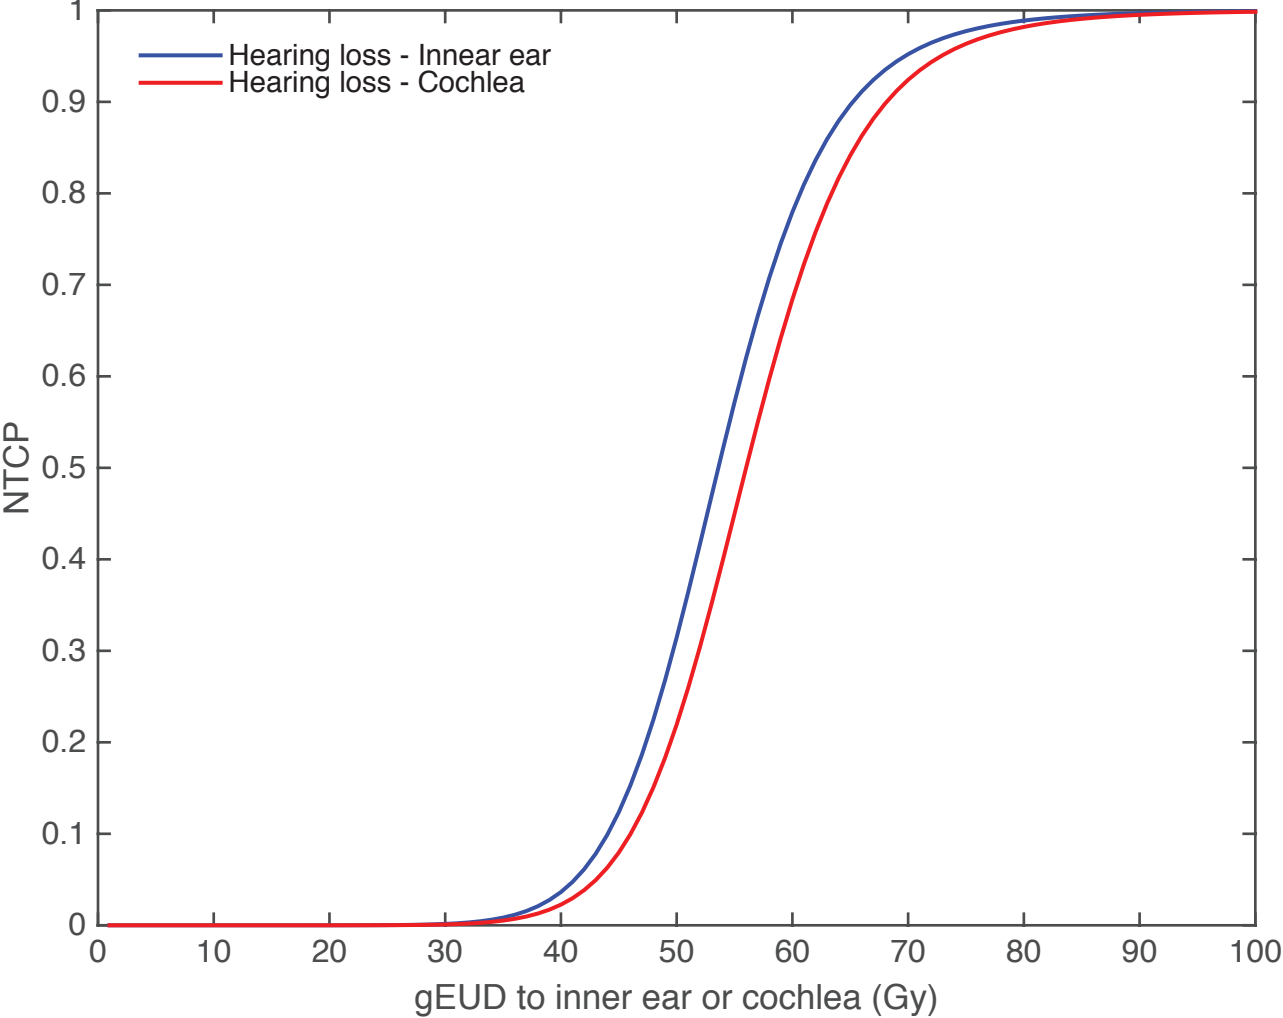

## Secondary cancer dose-response models

### Morton 2012

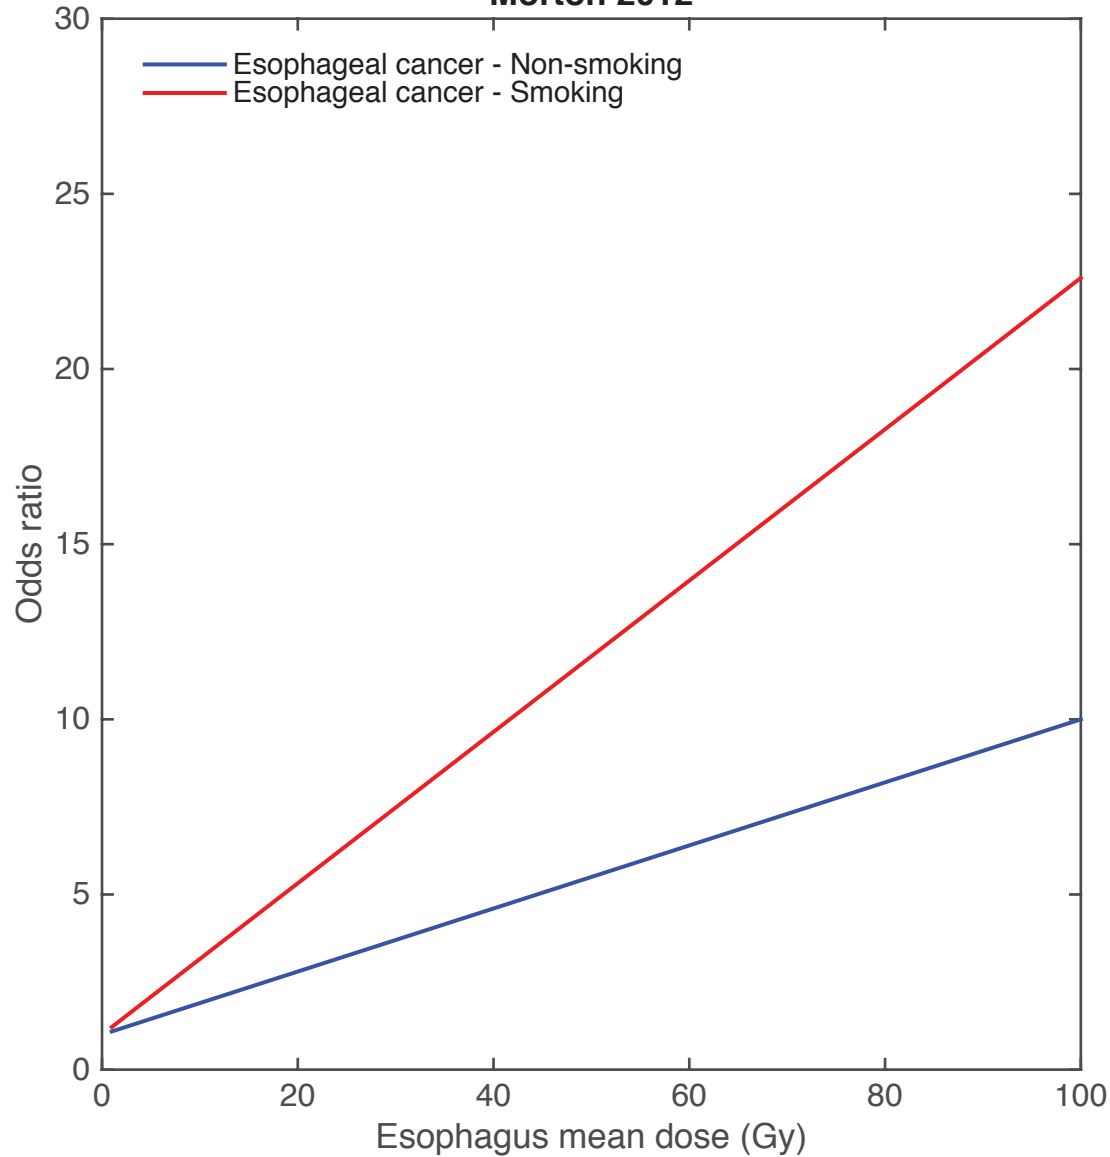

### Schneider 2011

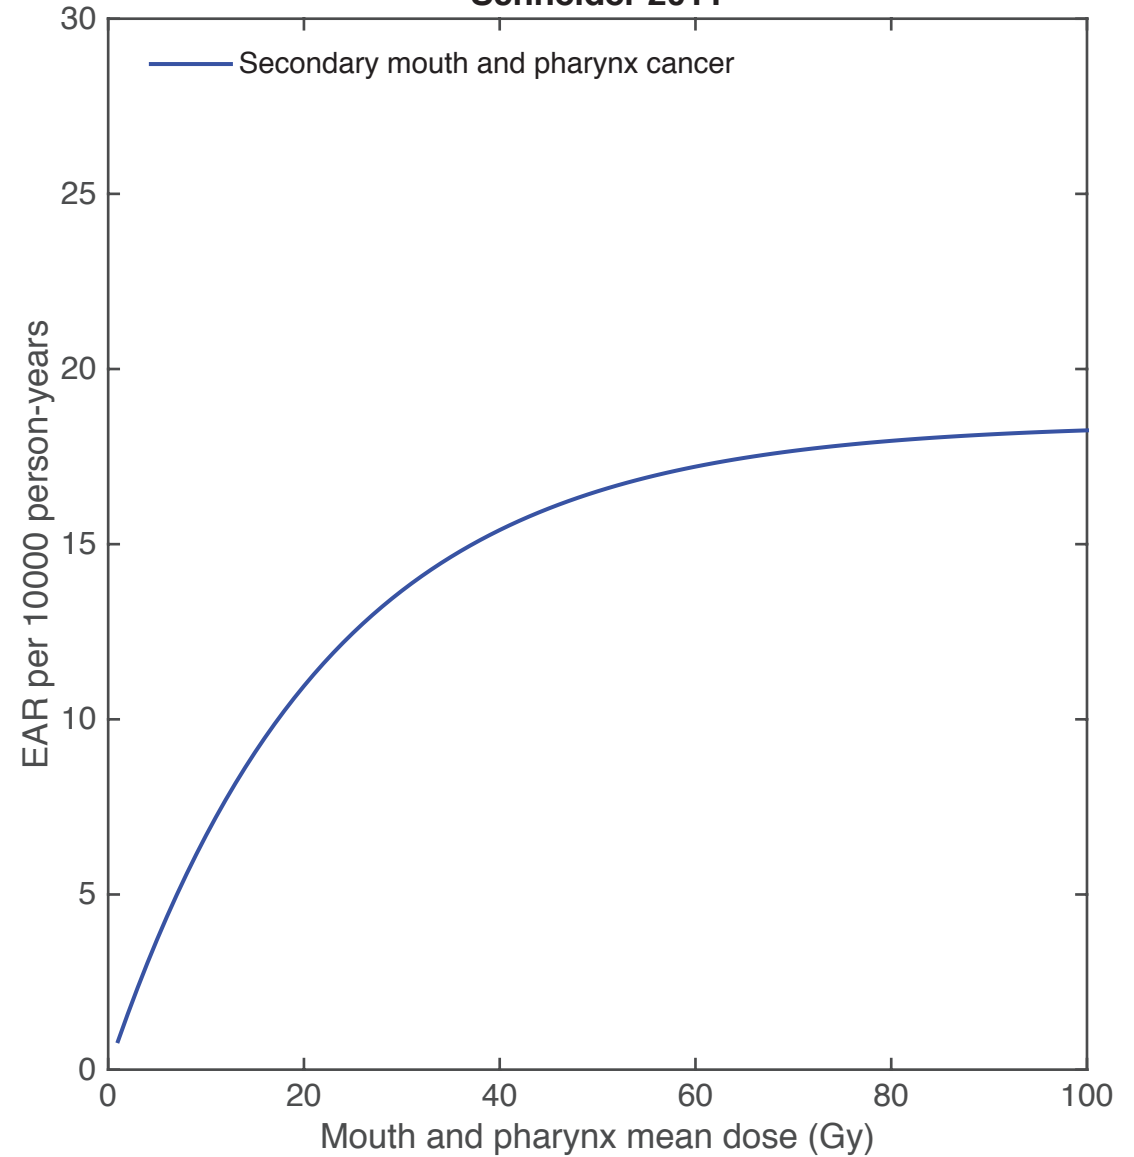

Supplement: NIHMS926107-supplement-1.pdf [file NIHMS926107-supplement-1.pdf]
