# Supplementary material
Source: PubMed Central journal article supplement (PMC5915347)
Supplement: NIHMS926107-supplement-3.pdf [file NIHMS926107-supplement-3.pdf]

## **Search strategies applied for literature review**

### Esophagitis

“radiation therapy AND esophagus AND dose-volume” English, between 1/1/2010 and 12/31/2016 for adults >19 years

### Laryngeal edema and dysphagia

“radiation therapy AND larynx AND dose-volume” or “radiation therapy AND laryngeal edema AND dose-response” or “radiation therapy AND dysphagia AND patient-reported” English, between 1/1/2010 and 12/31/2016 for adults >19 years

### Xerostomia

“radiation therapy AND xerostomia AND dose-volume” English, between 1/1/2010 and 12/31/2016 for adults >19 years

### Hypothyroidism

“radiation-induced hypothyroidism” English, between 1/1/2010 and 12/31/2016 for adults >19 years

### Oral mucositis

“head and neck AND radiation mucositis AND dose-response” or “radiation therapy AND dose-volume AND mucositis” English, between 1/1/2010 and 12/31/2016 for adults >19 years

### Fatigue

“radiation-induced fatigue” or “head and neck AND fatigue AND dose AND radiation” or “head and neck AND fatigue AND dose-response AND radiation” English, between 1/1/2010 and 12/31/2016 for adults >19 years

### Optic nerve and chiasm

“radiation-induced optic neuropathy” English, between 1/1/2010 and 12/31/2016 for adults >19 years

### Hearing loss

“radiation therapy AND hearing loss AND (dose-volume OR dose-response)” English, between 1/1/2010 and 12/31/2016 for adults >19 years

### Brainstem injury

“radiation therapy AND brainstem injury AND dose” English, between 1/1/2010 and 12/31/2016 for adults >19 years

Multiple combinations of search terms were used to find reports of secondary cancers after head and neck RT.
