# Supplementary material
Source: PubMed Central journal article supplement (PMC5915347)
Supplement: NIHMS926107-supplement-4.pdf [file NIHMS926107-supplement-4.pdf]

**Table S1.** Selected items from the TRIPOD statement checklist for comparing prediction model studies.

|                                       | TRIPOD model development and validation checklist item # related to methods and results |     |    |    |    |   |     |     |     |    |    |     |     |     |     |     |      |    |    |
|---------------------------------------|-----------------------------------------------------------------------------------------|-----|----|----|----|---|-----|-----|-----|----|----|-----|-----|-----|-----|-----|------|----|----|
|                                       | 4ab                                                                                     | 5ac | 5b | 6a | 7a | 9 | 10b | 10c | 10d | 11 | 12 | 13a | 13b | 13c | 14a | 14b | 15ab | 16 | 17 |
| <b><i>Dysphagia</i></b>               |                                                                                         |     |    |    |    |   |     |     |     |    |    |     |     |     |     |     |      |    |    |
| Christianen et al. 2012 <sup>20</sup> | ✓                                                                                       | ✓   | ✓  | ✓  | ✓  | ✓ |     |     | ✓   | ✓  |    |     | ✓   |     |     | ✓   | ✓    | ✓  |    |
| Otter et al. 2015 <sup>24</sup>       | ✓                                                                                       | ✓   | ✓  | ✓  | ✓  | ✓ |     |     | ✓   |    |    | ✓   | ✓   |     | ✓   |     | ✓    | ✓  |    |
| Bhide et al. 2012 <sup>35</sup>       | ✓                                                                                       | ✓   | ✓  | ✓  | ✓  | ✓ |     |     | ✓   |    |    |     |     |     |     |     |      | ✓  |    |
| <b><i>Esophagitis</i></b>             |                                                                                         |     |    |    |    |   |     |     |     |    |    |     |     |     |     |     |      |    |    |
| Huang et al. 2012 <sup>26</sup>       | ✓                                                                                       | ✓   | ✓  | ✓  | ✓  | ✓ | ✓   | ✓   | ✓   |    |    | ✓   | ✓   |     | ✓   | ✓   | ✓    |    |    |
| Kwint et al. 2012 <sup>27</sup>       | ✓                                                                                       | ✓   | ✓  | ✓  | ✓  | ✓ |     |     |     |    |    | ✓   | ✓   |     | ✓   | ✓   | ✓    |    |    |
| Wijsman et al. 2015 <sup>28</sup>     | ✓                                                                                       | ✓   | ✓  | ✓  | ✓  | ✓ | ✓   | ✓   | ✓   |    |    | ✓   | ✓   |     | ✓   | ✓   | ✓    | ✓  |    |
| Wu et al. 2014 <sup>29</sup>          |                                                                                         | ✓   | ✓  | ✓  | ✓  | ✓ |     |     |     | ✓  |    | ✓   | ✓   |     | ✓   |     |      |    |    |
| <b><i>Hypothyroidism</i></b>          |                                                                                         |     |    |    |    |   |     |     |     |    |    |     |     |     |     |     |      |    |    |
| Bakhshandeh et al. 2013 <sup>43</sup> |                                                                                         | ✓   | ✓  | ✓  | ✓  | ✓ | ✓   |     |     |    |    | ✓   | ✓   |     | ✓   |     | ✓    |    |    |
| Boomsma et al. 2012 <sup>44</sup>     | ✓                                                                                       | ✓   | ✓  | ✓  | ✓  | ✓ | ✓   | ✓   | ✓   |    |    | ✓   | ✓   |     | ✓   | ✓   | ✓    | ✓  |    |
| Cella et al. 2012 <sup>49</sup>       |                                                                                         | ✓   | ✓  | ✓  | ✓  | ✓ | ✓   | ✓   | ✓   |    | ✓  | ✓   | ✓   |     | ✓   |     | ✓    | ✓  |    |
| Rønjom et al. 2015 <sup>45</sup>      | ✓                                                                                       | ✓   | ✓  | ✓  | ✓  | ✓ | ✓   | ✓   | ✓   |    | ✓  | ✓   | ✓   | ✓   | ✓   |     | ✓    | ✓  |    |
| Vogelius et al. 2011 <sup>50</sup>    | ✓                                                                                       | ✓   | ✓  | ✓  | ✓  |   |     |     |     | ✓  |    |     | ✓   |     |     |     | ✓    |    |    |
| <b><i>Xerostomia</i></b>              |                                                                                         |     |    |    |    |   |     |     |     |    |    |     |     |     |     |     |      |    |    |
| Chen et al. 2013 <sup>31</sup>        | ✓                                                                                       | ✓   | ✓  | ✓  | ✓  | ✓ |     |     |     |    |    | ✓   | ✓   |     |     | ✓   | ✓    |    |    |
| Moiseenko et al. 2012 <sup>32</sup>   | ✓                                                                                       | ✓   | ✓  | ✓  | ✓  | ✓ |     | ✓   |     |    | ✓  | ✓   | ✓   |     | ✓   |     | ✓    |    | ✓  |
| Beetz et al. 2012 <sup>30</sup>       | ✓                                                                                       | ✓   | ✓  | ✓  | ✓  | ✓ | ✓   |     | ✓   |    |    | ✓   | ✓   |     | ✓   |     | ✓    | ✓  |    |
| <b><i>Oral mucositis</i></b>          |                                                                                         |     |    |    |    |   |     |     |     |    |    |     |     |     |     |     |      |    |    |
| Dean et al. 2016 <sup>36</sup>        | ✓                                                                                       | ✓   | ✓  | ✓  | ✓  | ✓ | ✓   | ✓   | ✓   |    |    |     | ✓   |     |     | ✓   | ✓    | ✓  |    |
| Otter et al. 2015 <sup>24</sup>       | ✓                                                                                       | ✓   | ✓  | ✓  | ✓  | ✓ |     |     | ✓   |    |    | ✓   | ✓   |     | ✓   |     | ✓    | ✓  |    |
| Sanguineti et al. 2012 <sup>37</sup>  | ✓                                                                                       | ✓   | ✓  | ✓  | ✓  |   | ✓   |     | ✓   | ✓  |    | ✓   | ✓   |     |     | ✓   |      | ✓  |    |
| Bhide et al. 2012 <sup>35</sup>       | ✓                                                                                       | ✓   | ✓  | ✓  | ✓  | ✓ |     |     | ✓   |    |    |     |     |     |     |     |      | ✓  |    |
| <b><i>Hearing loss</i></b>            |                                                                                         |     |    |    |    |   |     |     |     |    |    |     |     |     |     |     |      |    |    |
| De Marzi et al. 2015 <sup>51</sup>    | ✓                                                                                       | ✓   | ✓  | ✓  | ✓  | ✓ | ✓   |     | ✓   |    |    | ✓   |     |     | ✓   |     | ✓    | ✓  |    |
| <b><i>Secondary cancer</i></b>        |                                                                                         |     |    |    |    |   |     |     |     |    |    |     |     |     |     |     |      |    |    |
| Morton et al. 2012 <sup>65</sup>      | ✓                                                                                       | ✓   | ✓  | ✓  | ✓  | ✓ | ✓   |     |     | ✓  |    | ✓   | ✓   |     | ✓   |     | ✓    |    |    |
| Schneider et al. 2011 <sup>67</sup>   | ✓                                                                                       | ✓   | ✓  | ✓  | ✓  |   | ✓   |     |     |    |    |     | ✓   |     |     |     | ✓    |    |    |

The following page provides a short description for each included item, whereas the full checklist can be accessed from:  
<https://www.equator-network.org/reporting-guidelines/tripod-statement/>

- 4ab** Describe source data and specify study dates
- 5ac** Specify study setting and provide treatment details
- 5b** Describe eligibility criteria
- 6a** Define predicted outcome including time of assessment
- 7a** Define predictor variables including time of measurement
- 9** Describe handling of missing data
- 10b** Specify model and model building procedures
- 10c** Describe prediction calculations in the validation setting
- 10d** Specify model performance metrics
- 11** Creation of various risk groups
- 12** Identify differences between training and validation data
- 13a** Describe sample size and number of events, preferably with temporal information
- 13b** Describe patient characteristics and potential missing data
- 13c** Show comparison of patient characteristics between training and validation data
- 14a** Specify analyzed sample size and number of events
- 14b** Report unadjusted associations between predictors and outcome
- 15ab** Present full prediction model and explain model use
- 16** Report performance measures with confidence intervals
- 17** Report results from model updating
