# Supplementary material
Source: PubMed Central journal article supplement (PMC5915347)

# Dysphagia

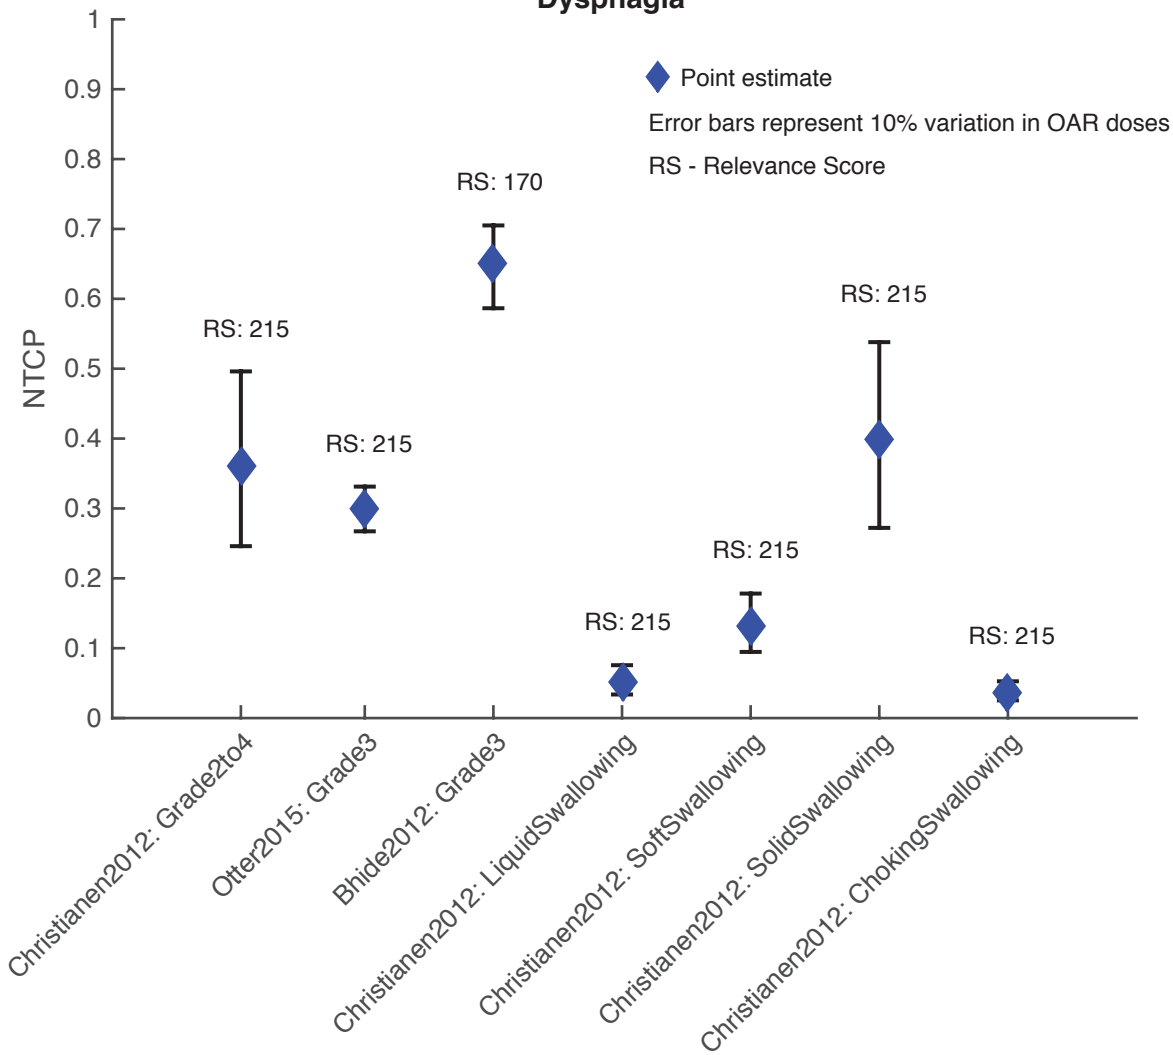

# Esophagitis

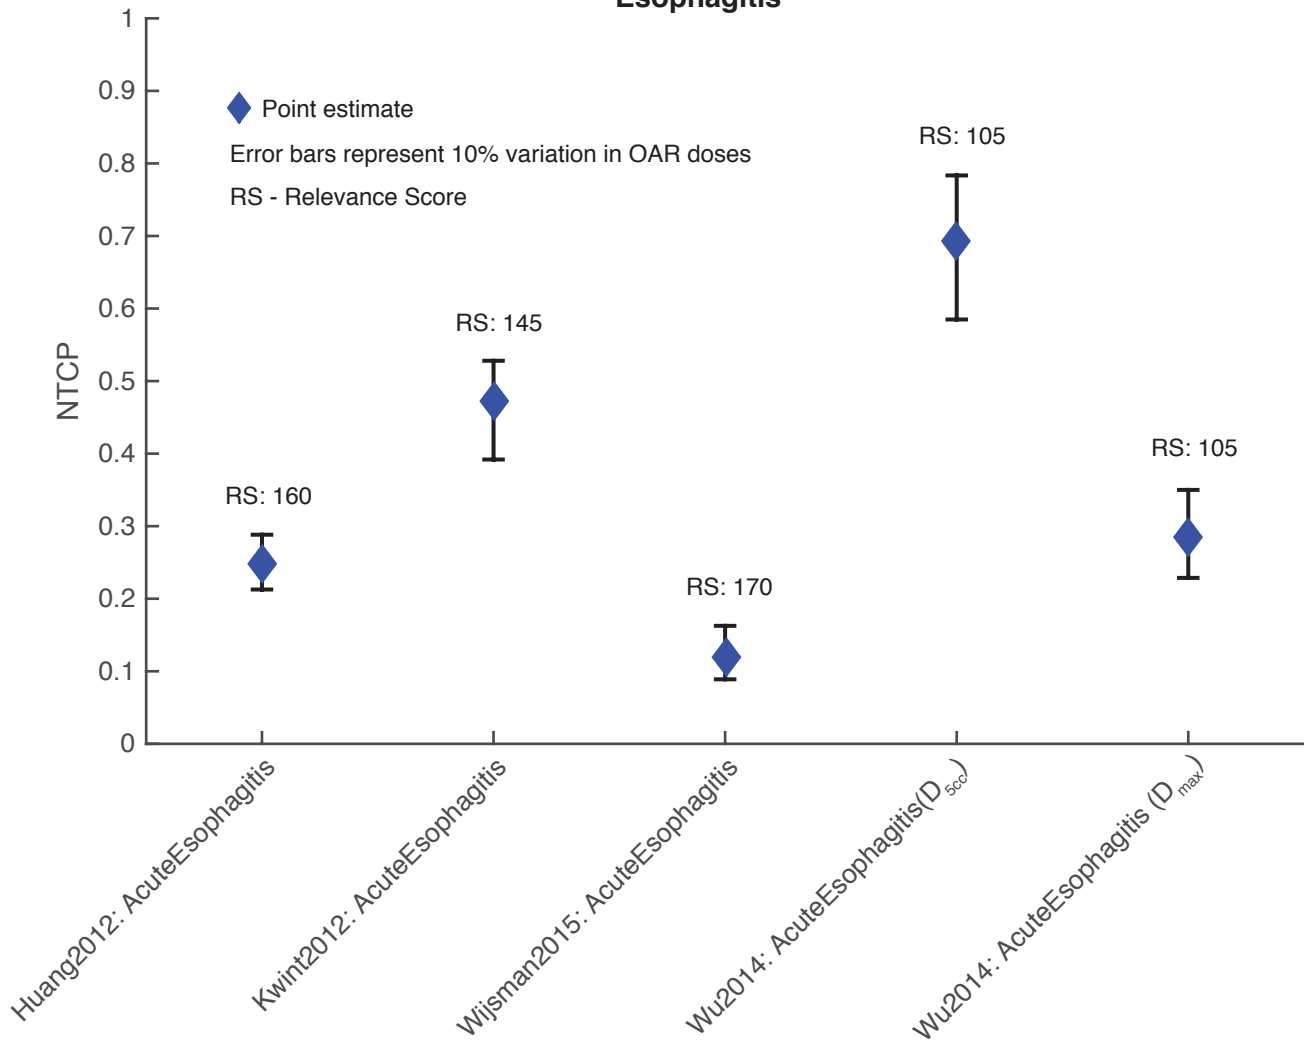

# Hypothyroidism

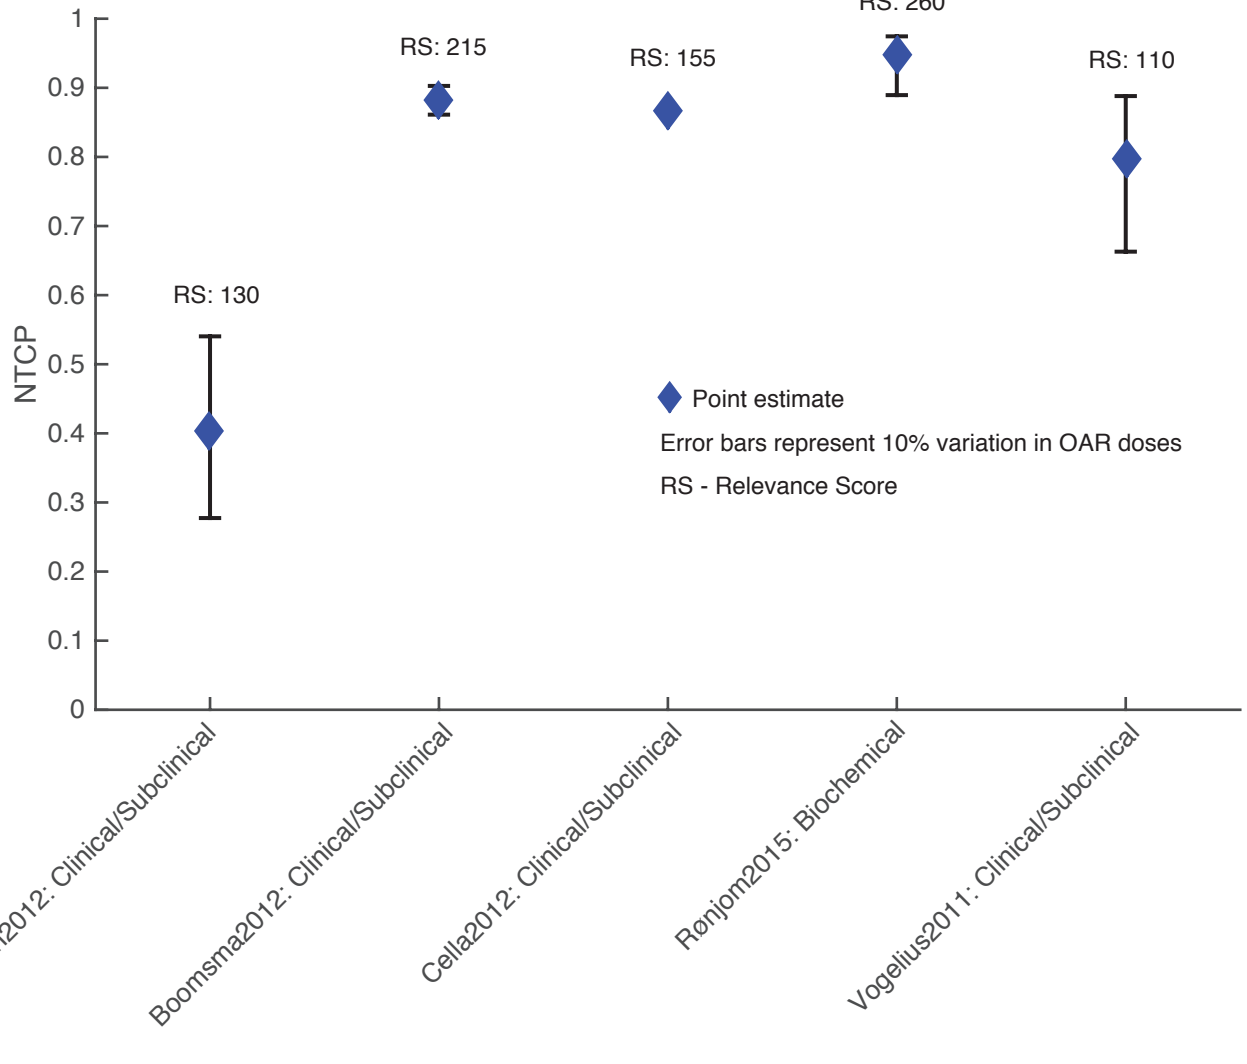

# Xerostomia

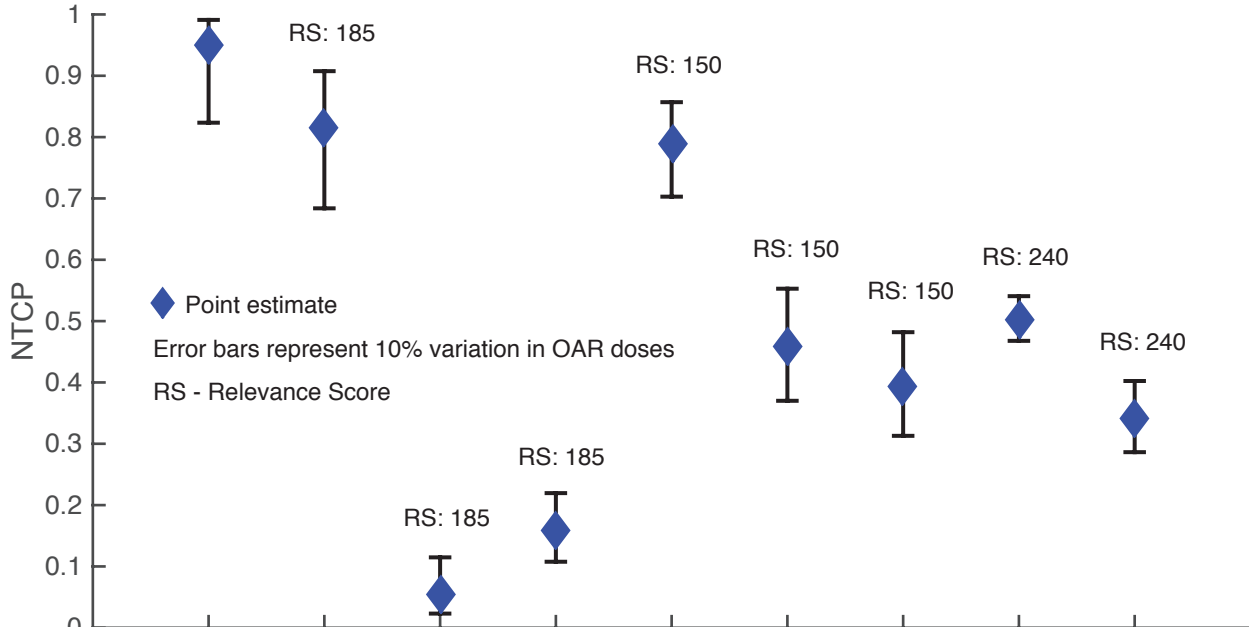

Chen2013: Xerostomia1year (ipsilateral)  
Chen2013: Xerostomia2year (ipsilateral)  
Chen2013: Xerostomia1year (contralateral)  
Chen2013: Xerostomia2year (contralateral)  
Moiseenko2012: Xerostomia3months (BCCA)  
Moiseenko2012: Xerostomia12months (BCCA)  
Moiseenko2012: Xerostomia12months (WUSTL)  
Beetz2012: Xerostomia  
Beetz2012: StickySaliva

# Oral mucositis

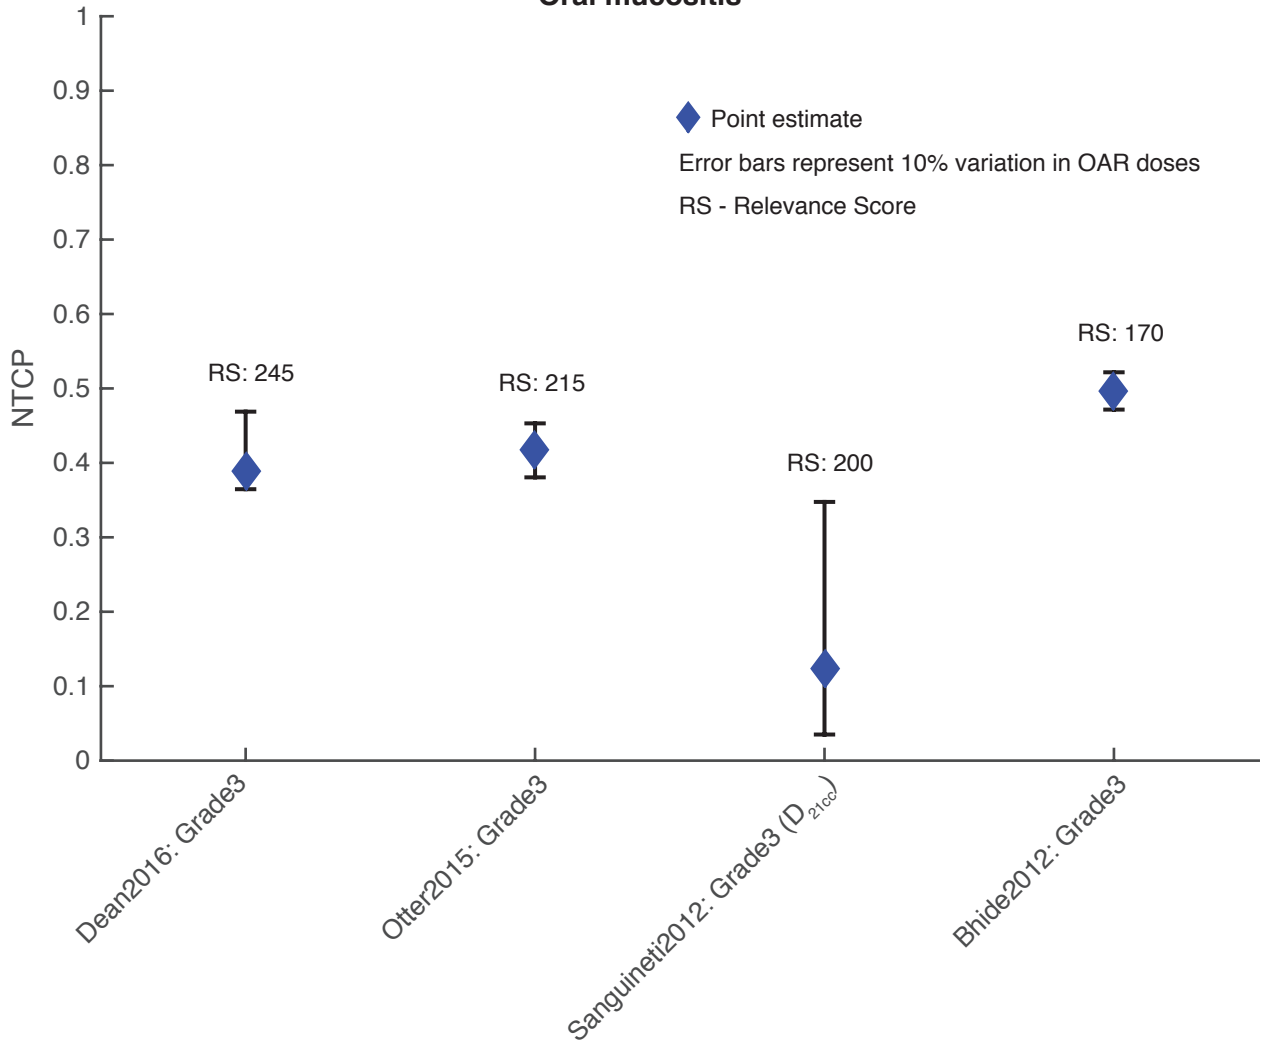

# Hearing loss

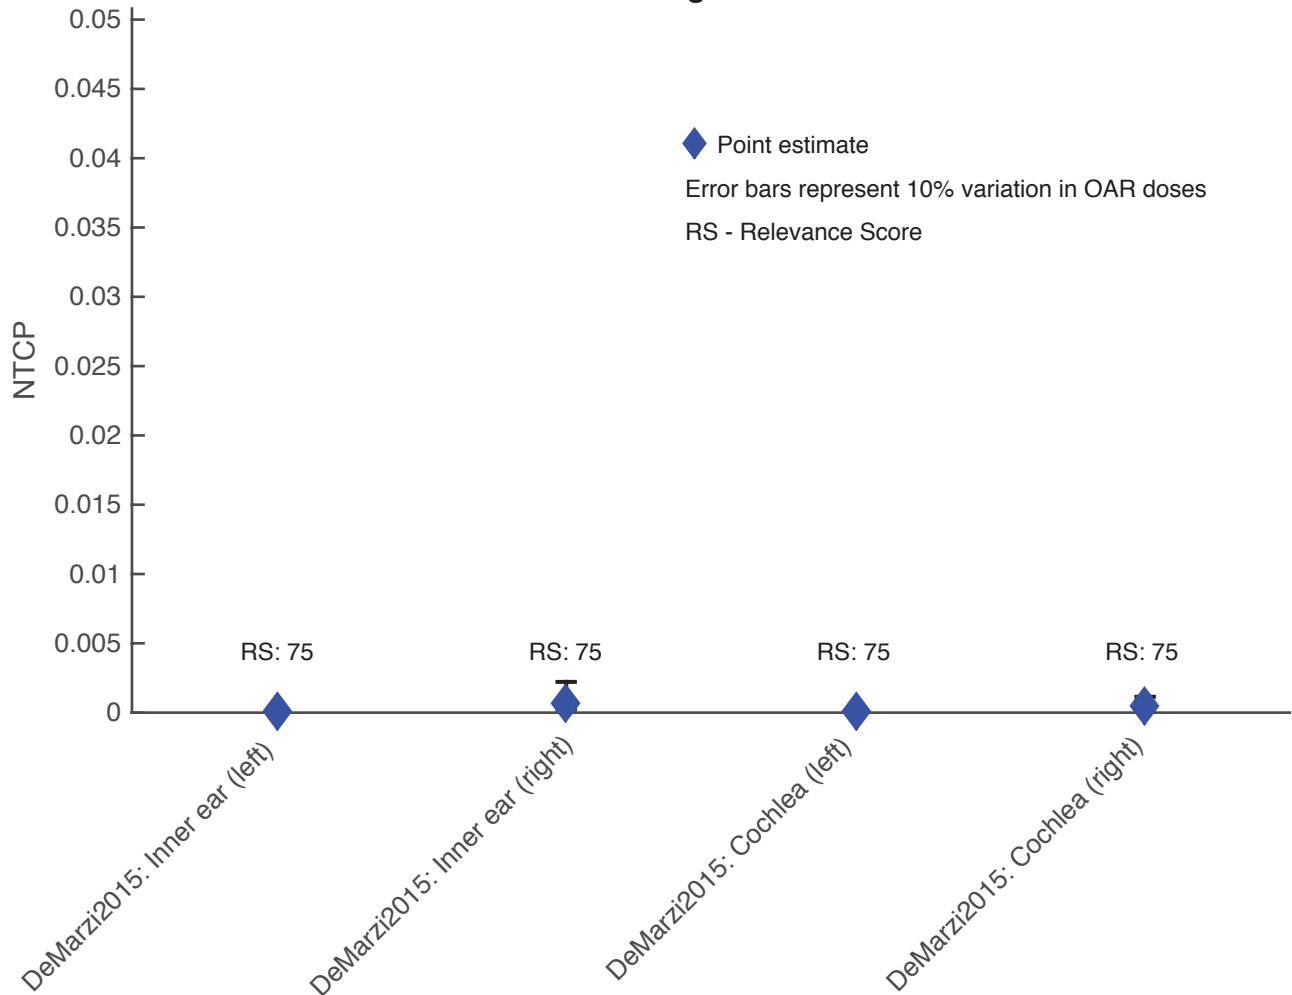

## Secondary cancer

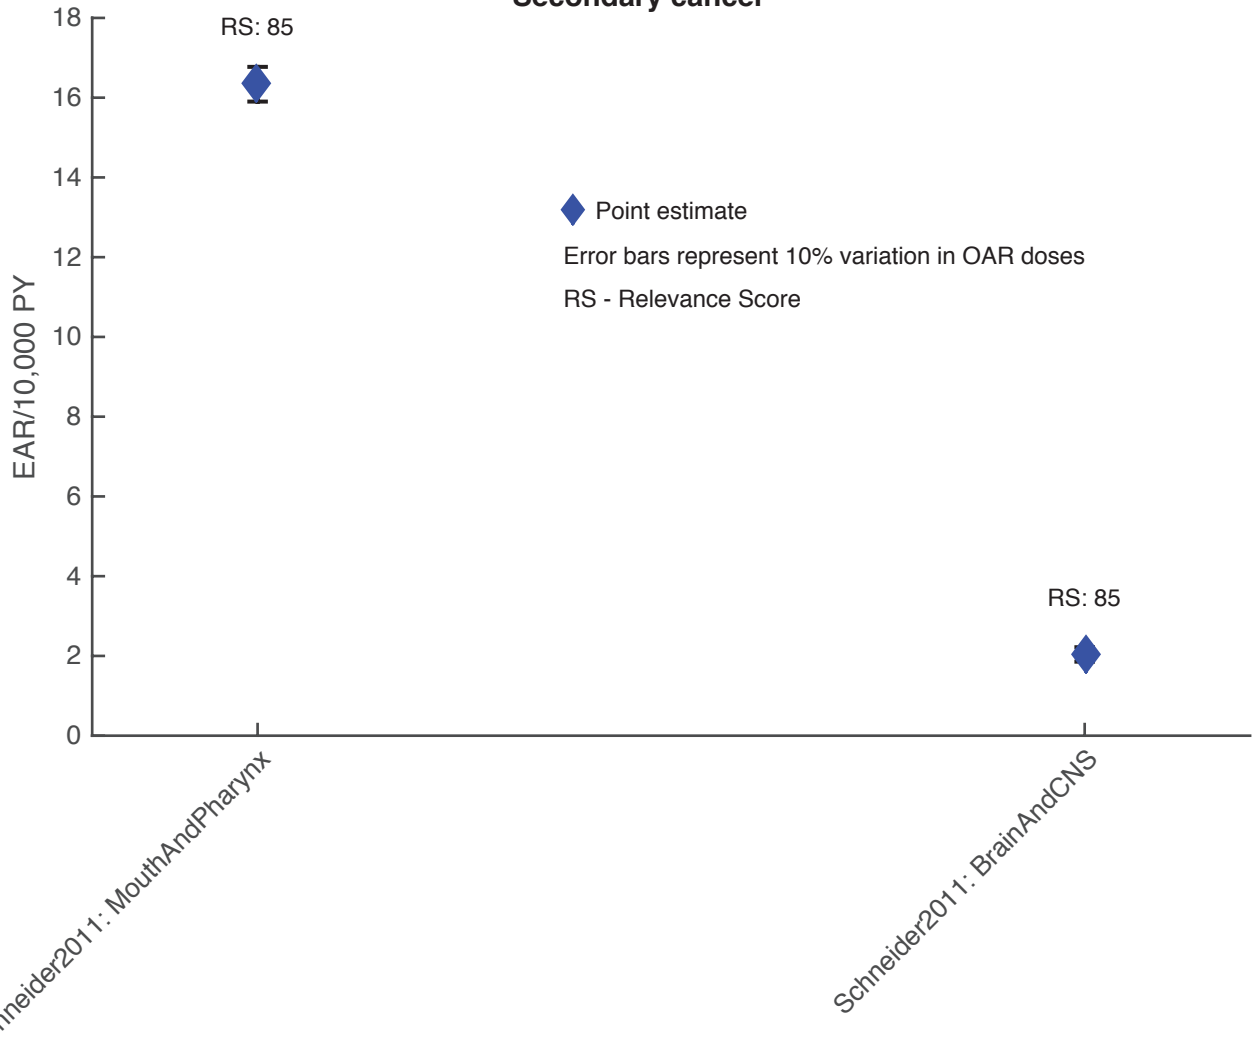

## Secondary cancer

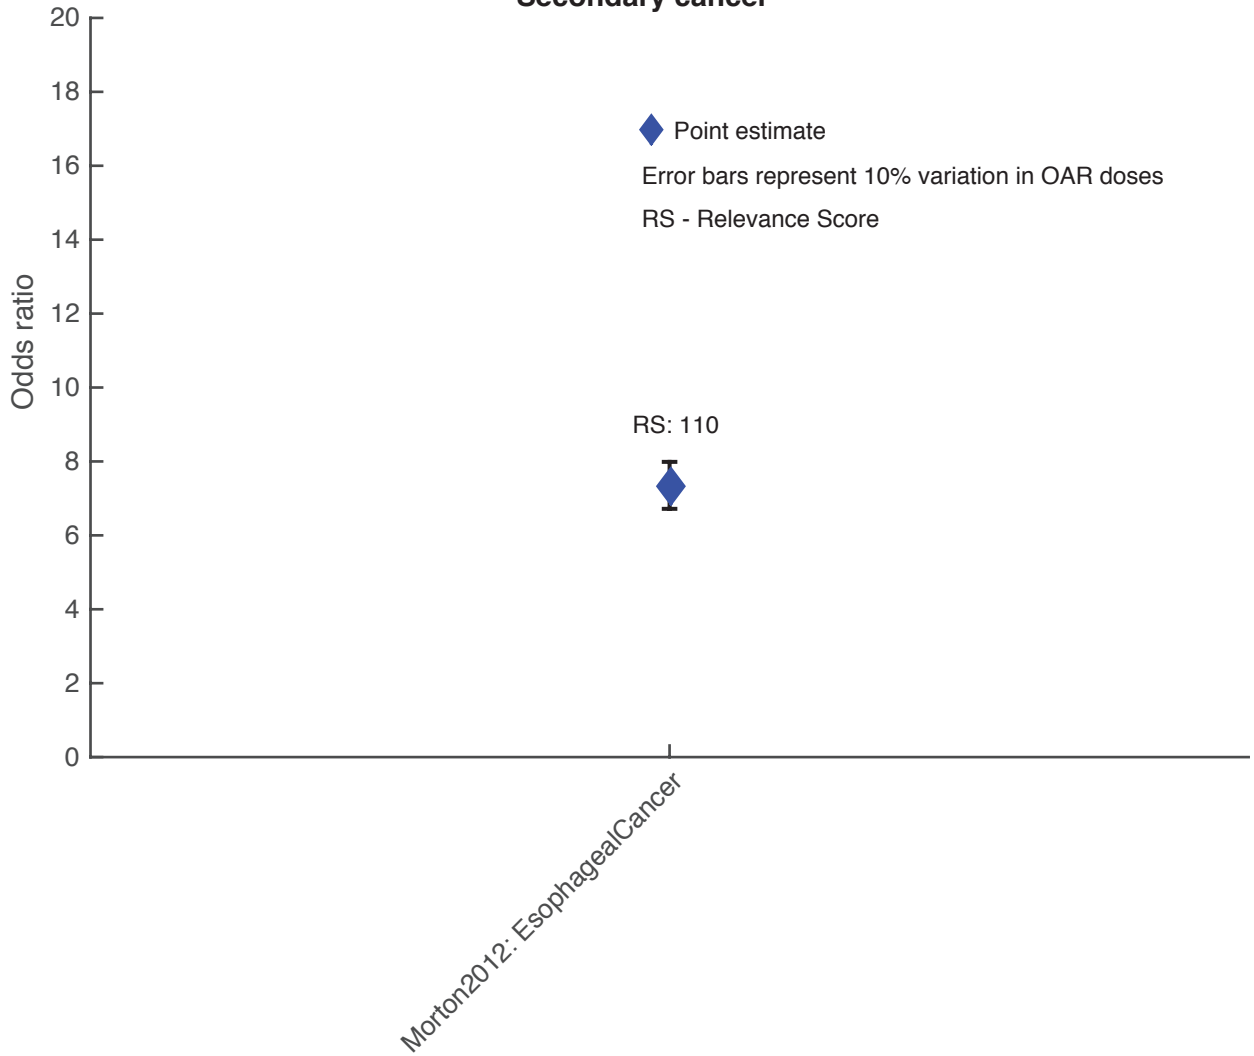

Supplement: NIHMS926107-supplement-5.pdf [file NIHMS926107-supplement-5.pdf]
